# Supplementary material for: Design of New Benzo[h]chromene Derivatives: Antitumor Activities and Structure-Activity Relationships of the 2,3-Positions and Fused Rings at the 2,3-Positions
Source: MDPI journal article supplement (doi:10.3390/molecules22030479), 2017-03-18
Supplement: s1 [file s1]

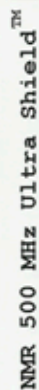

NMR 500 MHz Ultra Shield™

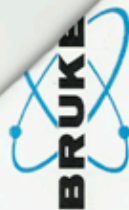

13C (AG-5F)

[illegible]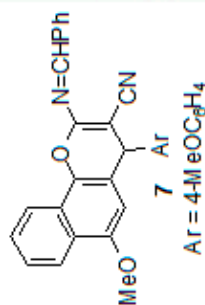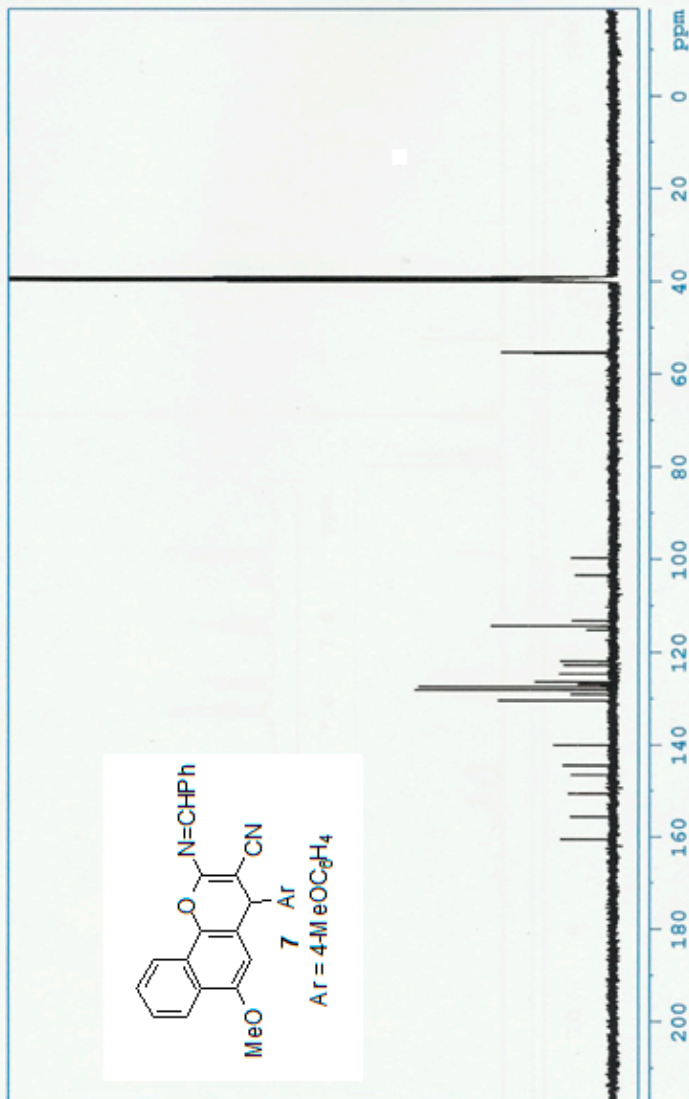

| NAME           | VALUE          | UNIT |
|----------------|----------------|------|
| APRIL-2013-INT | 161            |      |
| EXPNO          | 1              |      |
| PROCNO         | 1              |      |
| DATE_          | 20130102       |      |
| TIME           | 5:58           |      |
| INSTRUM        | SPR            |      |
| PROBHD         | 5 MM PABBO RB- |      |
| PULPROG        | zgpg30         |      |
| TD             | 65536          |      |
| RG             | 32             |      |
| DELTA          | 1280           |      |
| ACQ            | 4              |      |
| DS             | 2961.564       | Hz   |
| SWH            | 16.800         | kHz  |
| FIDRES         | 0.1010548      | sec  |
| RG             | 203            |      |
| WID            | 16.800         | usec |
| DE             | 76.5           | usec |
| TE             | 2.000000000    | sec  |
| DELTA          | 0.03000000     | sec  |
| DELTA          | 1              |      |
| CHANEL #1      | 13C            |      |
| NUC1           | 13C            |      |
| P1             | 9.80           | usec |
| PL1            | 0.00           | dB   |
| NUC2           | 70.4399999     | MHz  |
| P2             | 0.90           | usec |
| PL2            | 12.7703643     | dB   |
| CHANEL #2      | 1H             |      |
| NUC2           | 1H             |      |
| P1             | 89.00          | usec |
| PL1            | 3.00           | dB   |
| P2             | 1.46           | dB   |
| PL2            | 13.34460926    | dB   |
| PL12           | 0.45616822     | M    |
| PL13           | 0.28794256     | M    |
| PL14           | 500.1327005    | MHz  |
| PL15           | 125.7578519    | MHz  |
| PL16           | 125.7578519    | MHz  |
| PL17           | 0.00           | dB   |
| PL18           | 1.00           | dB   |
| PL19           | 1.40           | dB   |

ALI ALSHAHRANI
