# Supplementary material for: Design of New Benzo[h]chromene Derivatives: Antitumor Activities and Structure-Activity Relationships of the 2,3-Positions and Fused Rings at the 2,3-Positions
Source: MDPI journal article supplement (doi:10.3390/molecules22030479), 2017-03-18
Supplement: s1 [file s1]

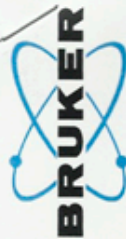

NMR 500 MHz Ultra Shield™

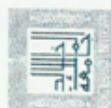

<sup>1</sup>H (AG-6F)

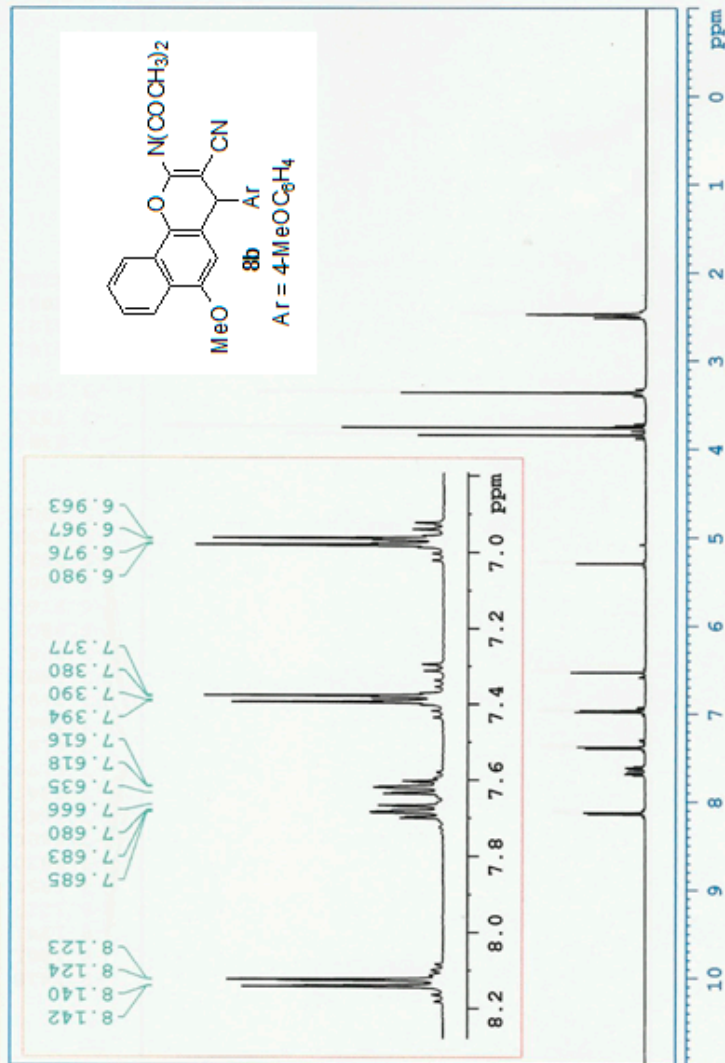

NAME April-2013-nmr  
EXPNO 130  
PROCNO 1  
Date\_ 20130412  
Time 0.40  
INSTRUM spect  
PROBHD 5 mm PABBO BB-  
PULPROG zgpg30  
TD 65536  
SOLVENT DMSO  
NS 64  
DS 2  
SWH 10330.572 Hz  
FIDRES 0.157632 Hz  
AQ 3.1719923 sec  
RG 114  
RG 114  
AQ 48.400 usec  
DM 327.7 usec  
TE 300.2 K  
D1 1.00000000 sec  
TD0 1  
===== CHANNEL f1 =====  
NUC1 <sup>1</sup>H  
P1 14.80 usec  
PL1 3.40 dB  
PL12 12.17042828 W  
SFO1 500.1300000 MHz  
SF 500.1300000 MHz  
WDW EM  
SSB 0  
GB 0.30 Hz  
PC 1.00

ALI ALSHAHRANI
