# Supplementary material for: Design of New Benzo[h]chromene Derivatives: Antitumor Activities and Structure-Activity Relationships of the 2,3-Positions and Fused Rings at the 2,3-Positions
Source: MDPI journal article supplement (doi:10.3390/molecules22030479), 2017-03-18
Supplement: s1 [file s1]

160.25  
158.12  
151.10  
137.64  
136.74  
128.77  
128.56  
128.30  
127.17  
126.10  
124.33  
123.66  
121.61  
120.69  
120.58  
118.09  
114.00  
103.44  
56.43  
55.64  
54.96  
40.70  
40.07  
39.98  
39.90  
39.81  
39.73  
39.64  
39.57  
39.48  
39.31  
39.14  
39.08

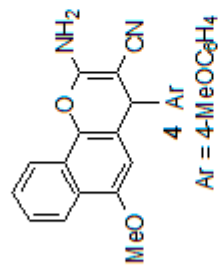

NAME Jan09-2012-nmr  
EXPNO 11  
PROCNO 1  
F2Ac- 20130110  
Time 5.38  
INSTRUM spect  
PROBHD 5 mm PABBO BB  
PULPROG zgpg30  
TD 65536  
SOLVENT DMSO  
AQ 1270  
RG 1  
F1 (MHz) 29763.904 Hz  
F2 (MHz) 0.454131 Hz  
AQ 1.1010348 sec  
RG 203  
IN 14.800 usec  
DE 4.50 usec  
TE 283.2 K  
T1 2.00000000 sec  
T11 0.10000000 sec  
T12 0.03000000 sec  
T13 1  
===== CHANNEL f1 =====  
NUC1 13C  
P1 12C  
PL1 9.80 usec  
PL12 0.90 dB  
PL1W 70.43995467 W  
SFO1 125.7703643 MHz  
===== CHANNEL f2 =====  
CPDPRG2 waltz16  
NUC2 1H  
PCPD2 80.00 uMAG  
PL2 3.00 dB  
PL12 17.66 dB  
PL13 19.66 dB  
PL1W 13.34480750 W  
PL2W 0.93333334 W  
PL1W 0.28794254 W  
PL1W 0.28794254 W  
SFO2 500.1320005 MHz  
SI 32748  
SF 125.7578519 MHz  
WDW EM  
SSB 0  
LB 1.00 Hz  
GB 0  
PC 1.40

200 180 160 140 120 100 80 60 40 20 0 ppm
