# Supplementary material for: Design of New Benzo[h]chromene Derivatives: Antitumor Activities and Structure-Activity Relationships of the 2,3-Positions and Fused Rings at the 2,3-Positions
Source: MDPI journal article supplement (doi:10.3390/molecules22030479), 2017-03-18
Supplement: s1 [file s1]

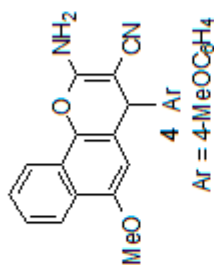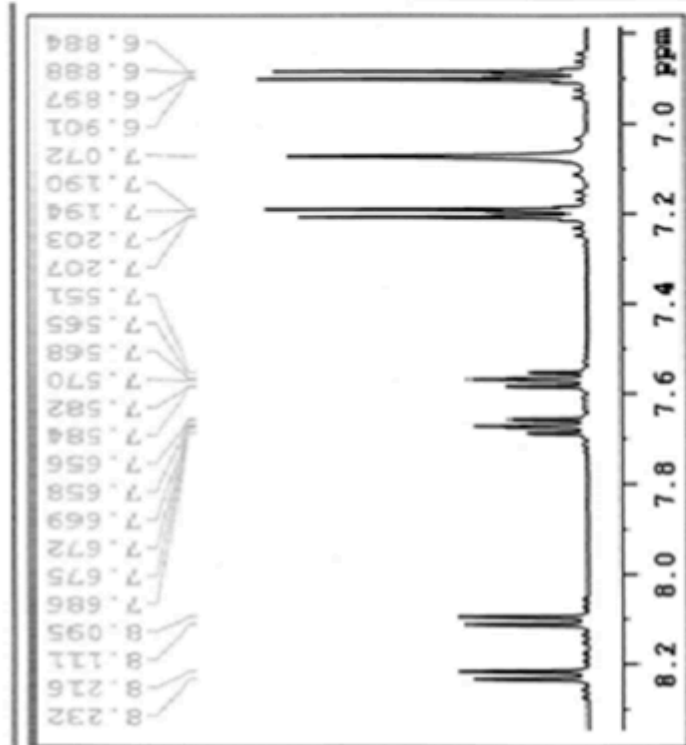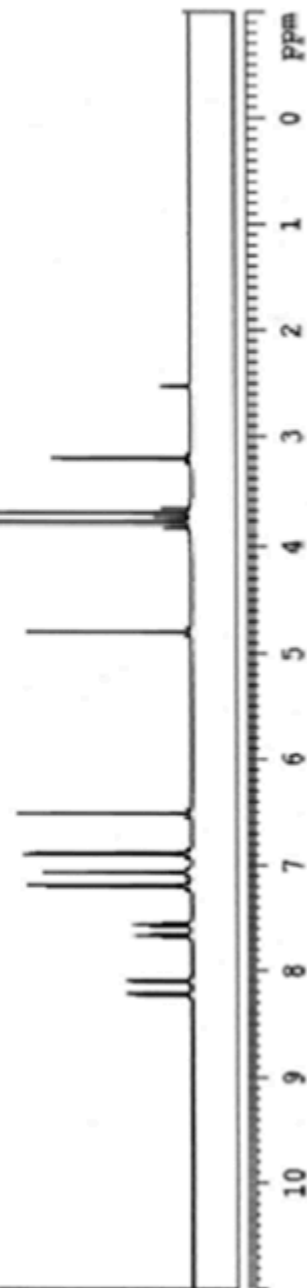

NAME Jan09-2012-08F  
 KX360 10  
 PROCNO 1  
 DATE 20120110  
 TIME 4:28  
 INSTRUM spect  
 PPROG 5 mm HANCO 89-  
 FIDRES 0.157432 Hz  
 TO 65536  
 SOLVENT DMSO  
 NS 64  
 DS 2  
 SWH 10330.578 Hz  
 FIDRES 0.157432 Hz  
 AQ 3.1719923 sec  
 RG 71.8  
 TB 48.400 0888  
 DE 6.50 usec  
 TE 260.0 K  
 D1 1.00000000 sec  
 T20 1  
 ----- CHANNEL f1 -----  
 NUC1 1H  
 P1 14.00 usec  
 PL 0.00 dB  
 F2 12.17042028 MHz  
 P2 0.00 dB  
 SFO1 500.1350665 MHz  
 SI 32768  
 SF 500.1299945 MHz  
 EX 0  
 SSB 0  
 LB 0.30 Hz  
 GB 0  
 PC 1.00
