# Supplementary material for: Design of New Benzo[h]chromene Derivatives: Antitumor Activities and Structure-Activity Relationships of the 2,3-Positions and Fused Rings at the 2,3-Positions
Source: MDPI journal article supplement (doi:10.3390/molecules22030479), 2017-03-18
Supplement: s1 [file s1]

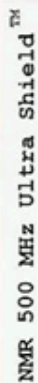

NMR 500 MHz Ultra Shield™

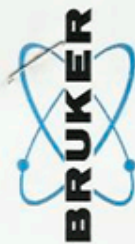

1H (AG-5F)

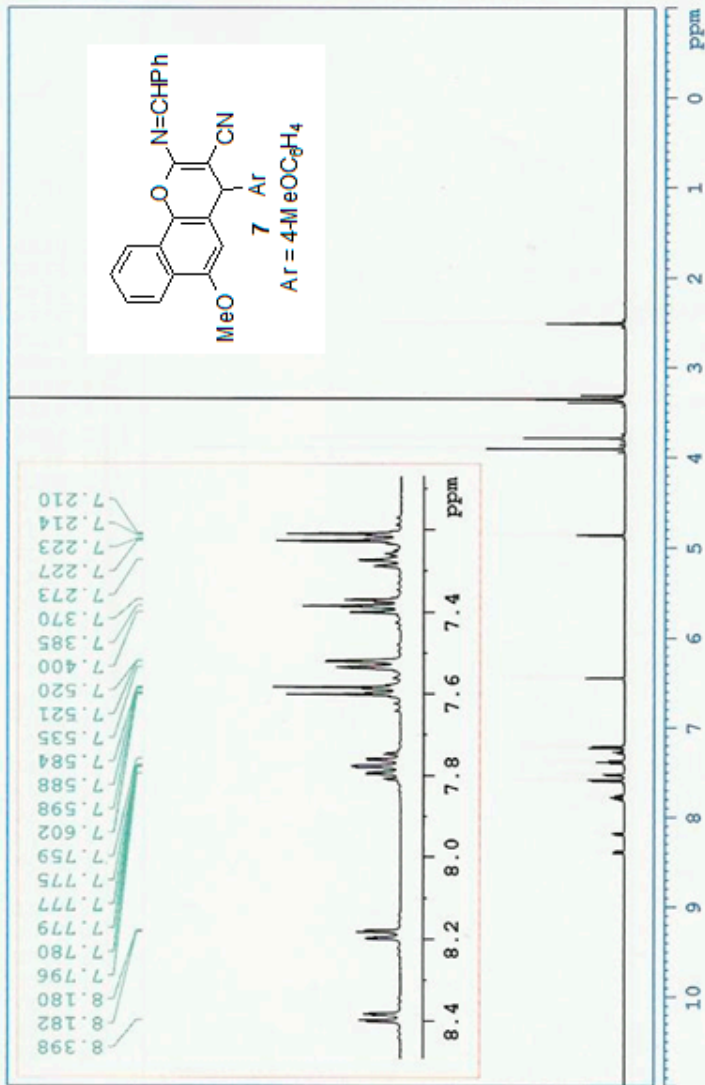

| NAME     |                | APRIL-2013-NAME |  |
|----------|----------------|-----------------|--|
| EXPRO    | 160            |                 |  |
| PROFNO   |                |                 |  |
| Date=    | 20130112       |                 |  |
| Time=    | 12:00:00       |                 |  |
| INSTRUM  | ASPECT         |                 |  |
| PROFID   | 5 mm PAINO BB  |                 |  |
| FILEPROG | 29230          |                 |  |
| TIME     | 655236         |                 |  |
| SOLVENT  | 2000           |                 |  |
| NS       | 6              |                 |  |
| EG       | 2              |                 |  |
| SWR1     | 1030.578 Hz    |                 |  |
| SWR2     | 1030.578 Hz    |                 |  |
| SWR3     | 3.177953 Hz    |                 |  |
| SWR4     | 203            |                 |  |
| SWR5     | 203            |                 |  |
| SWR6     | 48.400 usec    |                 |  |
| SWR7     | 6.50 usec      |                 |  |
| SWR8     | 2.50 usec      |                 |  |
| SWR9     | 1.00000000 sec |                 |  |
| SWR10    | 1              |                 |  |
| SWR11    | 1              |                 |  |
| SWR12    | 1              |                 |  |
| SWR13    | 1              |                 |  |
| SWR14    | 1              |                 |  |
| SWR15    | 1              |                 |  |
| SWR16    | 1              |                 |  |
| SWR17    | 1              |                 |  |
| SWR18    | 1              |                 |  |
| SWR19    | 1              |                 |  |
| SWR20    | 1              |                 |  |
| SWR21    | 1              |                 |  |
| SWR22    | 1              |                 |  |
| SWR23    | 1              |                 |  |
| SWR24    | 1              |                 |  |
| SWR25    | 1              |                 |  |
| SWR26    | 1              |                 |  |
| SWR27    | 1              |                 |  |
| SWR28    | 1              |                 |  |
| SWR29    | 1              |                 |  |
| SWR30    | 1              |                 |  |
| SWR31    | 1              |                 |  |
| SWR32    | 1              |                 |  |
| SWR33    | 1              |                 |  |
| SWR34    | 1              |                 |  |
| SWR35    | 1              |                 |  |
| SWR36    | 1              |                 |  |
| SWR37    | 1              |                 |  |
| SWR38    | 1              |                 |  |
| SWR39    | 1              |                 |  |
| SWR40    | 1              |                 |  |
| SWR41    | 1              |                 |  |
| SWR42    | 1              |                 |  |
| SWR43    | 1              |                 |  |
| SWR44    | 1              |                 |  |
| SWR45    | 1              |                 |  |
| SWR46    | 1              |                 |  |
| SWR47    | 1              |                 |  |
| SWR48    | 1              |                 |  |
| SWR49    | 1              |                 |  |
| SWR50    | 1              |                 |  |
| SWR51    | 1              |                 |  |
| SWR52    | 1              |                 |  |
| SWR53    | 1              |                 |  |
| SWR54    | 1              |                 |  |
| SWR55    | 1              |                 |  |
| SWR56    | 1              |                 |  |
| SWR57    | 1              |                 |  |
| SWR58    | 1              |                 |  |
| SWR59    | 1              |                 |  |
| SWR60    | 1              |                 |  |
| SWR61    | 1              |                 |  |
| SWR62    | 1              |                 |  |
| SWR63    | 1              |                 |  |
| SWR64    | 1              |                 |  |
| SWR65    | 1              |                 |  |
| SWR66    | 1              |                 |  |
| SWR67    | 1              |                 |  |
| SWR68    | 1              |                 |  |
| SWR69    | 1              |                 |  |
| SWR70    | 1              |                 |  |
| SWR71    | 1              |                 |  |
| SWR72    | 1              |                 |  |
| SWR73    | 1              |                 |  |
| SWR74    | 1              |                 |  |
| SWR75    | 1              |                 |  |
| SWR76    | 1              |                 |  |
| SWR77    | 1              |                 |  |
| SWR78    | 1              |                 |  |
| SWR79    | 1              |                 |  |
| SWR80    | 1              |                 |  |
| SWR81    | 1              |                 |  |
| SWR82    | 1              |                 |  |
| SWR83    | 1              |                 |  |
| SWR84    | 1              |                 |  |
| SWR85    | 1              |                 |  |
| SWR86    | 1              |                 |  |
| SWR87    | 1              |                 |  |
| SWR88    | 1              |                 |  |
| SWR89    | 1              |                 |  |
| SWR90    | 1              |                 |  |
| SWR91    | 1              |                 |  |
| SWR92    | 1              |                 |  |
| SWR93    | 1              |                 |  |
| SWR94    | 1              |                 |  |
| SWR95    | 1              |                 |  |
| SWR96    | 1              |                 |  |
| SWR97    | 1              |                 |  |
| SWR98    | 1              |                 |  |
| SWR99    | 1              |                 |  |
| SWR100   | 1              |                 |  |
| SWR101   | 1              |                 |  |
| SWR102   | 1              |                 |  |
| SWR103   | 1              |                 |  |
| SWR104   | 1              |                 |  |
| SWR105   | 1              |                 |  |
| SWR106   | 1              |                 |  |
|          |                |                 |  |

ALI ALSHAHRANI
