# Supplementary material for: Design of New Benzo[h]chromene Derivatives: Antitumor Activities and Structure-Activity Relationships of the 2,3-Positions and Fused Rings at the 2,3-Positions
Source: MDPI journal article supplement (doi:10.3390/molecules22030479), 2017-03-18
Supplement: s1 [file s1]

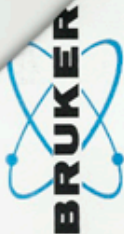

NMR 500 MHz Ultra Shield™

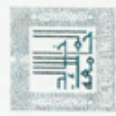

13C (AG-6F)

158.92  
152.49  
151.98  
151.75  
136.96  
136.88  
134.44  
129.41  
128.97  
127.90  
127.58  
126.74  
126.44  
124.59  
123.54  
121.72  
120.60  
116.39  
115.51  
114.38  
114.24  
103.08  
102.94  
92.19  
55.81  
55.06  
41.86  
41.79  
40.10  
40.01  
39.93  
39.77  
39.68  
39.60  
39.51  
39.34  
39.18  
39.01  
23.06

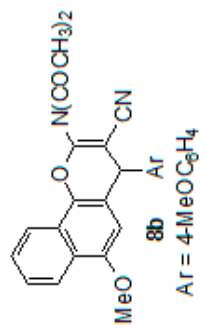

NAME April-2013-nmr  
EXPNO 131  
PROCNO 1  
Date\_ 20130412  
Time 1.50  
INSTRUM spect  
PROBHD 5 mm PABBO BB-  
PULPROG zgpg30  
TD 65536  
SOLVENT DMSO  
NS 1280  
DS 4  
SWH 29761.904 Hz  
FIDRES 0.454131 Hz  
AQ 1.1010548 sec  
RG 203  
DF 16.600 usec  
DE 259.4 K  
TE 259.4 K  
D1 2.00000000 sec  
D11 0.03000000 sec  
TD 1  
===== CHANNEL f1 =====  
NUC1 13C  
P1 13C  
PL1 0.00 dB  
F1 70.4395567 MHz  
SFO1 125.7703643 MHz  
===== CHANNEL f2 =====  
CPDPRG2 waltz16  
NUC2 1H  
PCPD2 80.00 usec  
P2 1H  
PL2 19.00 dB  
F2 500.136055 MHz  
SFO2 500.136055 MHz  
SI 32768  
SF 125.7578519 MHz  
WDW EM  
SSB 0  
LB 1.00 Hz  
GB 0  
PC 1.40

ALI ALSHAHRANI

200 180 160 140 120 100 80 60 40 20 0 ppm
