# Supplementary material for: Design of New Benzo[h]chromene Derivatives: Antitumor Activities and Structure-Activity Relationships of the 2,3-Positions and Fused Rings at the 2,3-Positions
Source: MDPI journal article supplement (doi:10.3390/molecules22030479), 2017-03-18

8.893  
8.832  
8.298  
8.107  
8.093  
7.664  
7.662  
7.652  
7.650  
7.639  
7.637  
7.594  
7.593  
7.581  
7.579  
7.569  
7.567  
7.365  
7.245  
7.230  
6.926  
6.912  
6.428  
4.974  
4.410  
4.398  
4.386  
4.375  
3.789  
3.731  
3.380  
2.515  
2.513  
2.510  
2.510  
1.372  
1.360  
1.348

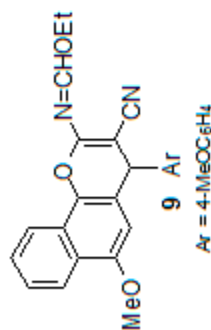

Current Data Parameters  
NAME 10-12  
EXPNO  
PROCNO

F2 - Acquisition Param

Date\_ 201212  
Time 11:11  
INSTRUM spect  
PROBHD 5 mm PABBI 11  
PULPROG zgpg30  
TD 655  
SOLVENT DMF  
NS 1  
DS 1  
SWH 12335.52  
FIDRES 0.1882  
AQ 2.6544  
RG 26.1  
DM 40.5  
DE 6.1  
TE 298  
D1 1.000000  
TD0

===== CHANNEL f1 ==

NUC1 13C  
P1 7.1  
PL1 15.500000  
SFO1 600.133704  
F2 - Processing param  
SI 655  
SF 600.133000  
RGW 0  
SSB 0  
LB 0.0  
GB 0  
PC 1.1

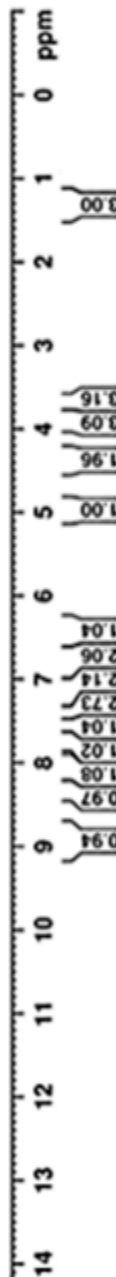

Supplement: s1 [file s1]
