# Supplementary material for: Design of New Benzo[h]chromene Derivatives: Antitumor Activities and Structure-Activity Relationships of the 2,3-Positions and Fused Rings at the 2,3-Positions
Source: MDPI journal article supplement (doi:10.3390/molecules22030479), 2017-03-18

8.533  
8.255  
8.242  
8.148  
8.134  
7.741  
7.740  
7.730  
7.728  
7.716  
7.714  
7.634  
7.632  
7.620  
7.608  
7.606  
7.354  
7.340  
6.873  
6.858  
6.601  
5.527  
3.919  
3.683  
3.447  
3.345  
2.515  
2.513  
2.510

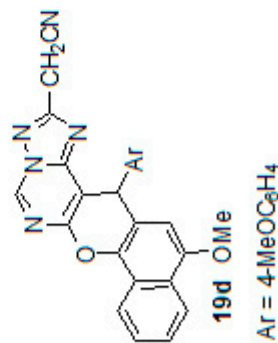

Current Data Parameter  
NAME  
EXPNO 1  
PROCNO

F2 - Acquisition Param  
Date\_ 2012122  
Time 7.5

INSTRUM spec  
PROBHD 5 mm PABBI 1H  
PULPROG zgpg30

TD 6553  
SOLVENT DMS  
NS 3

D5 12335.52  
SMX 0.18822  
FIDRES 2.65642

AQ 106.1  
RG 40.53  
DW 6.5  
DE 298.  
TE 1.0000000

TD0  
===== CHANNEL f1 ==

NUC1 1  
P1 7.5  
PLW1 15.500000  
SFO1 600.133706

F2 - Processing param  
SI 6553  
SF 600.130000  
WDW E  
SSB 0  
LB 0.3  
GB 0  
PC 1.0

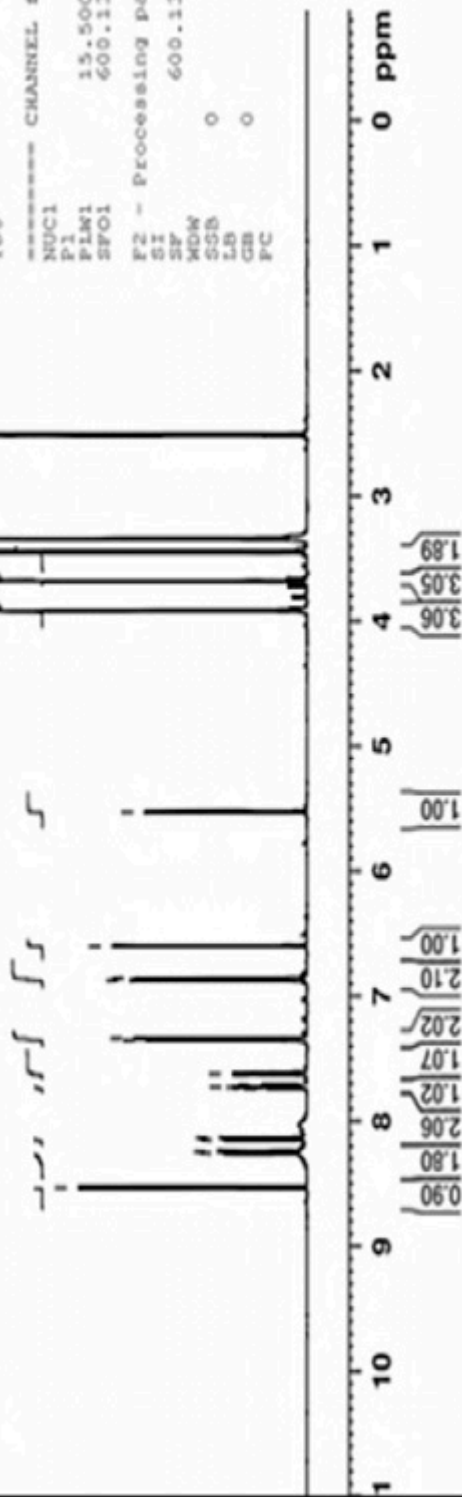

Supplement: s1 [file s1]
