# Supplementary material for: Design of New Benzo[h]chromene Derivatives: Antitumor Activities and Structure-Activity Relationships of the 2,3-Positions and Fused Rings at the 2,3-Positions
Source: MDPI journal article supplement (doi:10.3390/molecules22030479), 2017-03-18
Supplement: s1 [file s1]

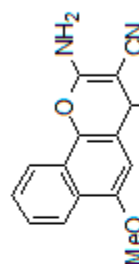

4 Ar  
Ar = 4-MeOC<sub>6</sub>H<sub>4</sub>

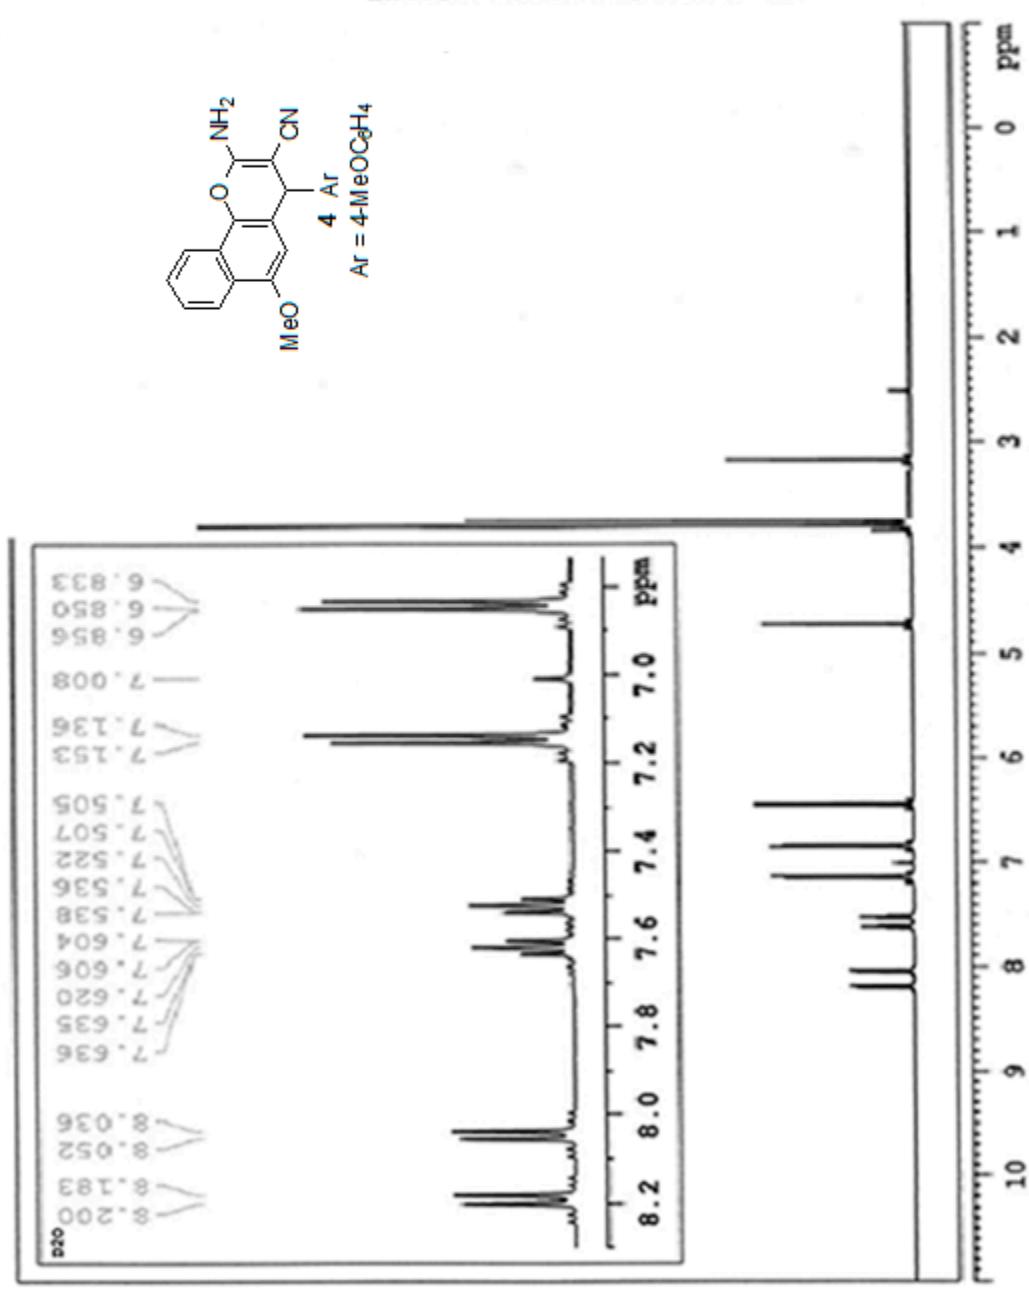

NAME 2012-09-20-001  
EXPNO 12  
PROCNO 1  
Date\_ 20120920  
Time 12.22  
INSTRUM spect  
PROBHD 5 mm PABBO 20-  
PULPROG zgpg30  
TD 65536  
SOLVENT DMSO  
NS 44  
DS 2  
SWH 10230.578 Hz  
FIDRES 0.151832 Hz  
AQ 2.319923 sec  
RG 60.6  
RW 48.400 Hz  
DC 6.50 Hz  
TE 266.3 K  
D1 1.00000000 sec  
TD0 1  
----- CHANNEL f1 -----  
NUC1 1H  
P1 14.00 Hz  
PL1 3.40 dB  
PL1W 12.17042829 W  
SFO1 500.1300885 MHz  
SI 32768  
SF 500.1300000 MHz  
WDW EM  
SSB 0  
LB 0.30 Hz  
GB 0  
PC 1.00
