# Supplementary material for: Design of New Benzo[h]chromene Derivatives: Antitumor Activities and Structure-Activity Relationships of the 2,3-Positions and Fused Rings at the 2,3-Positions
Source: MDPI journal article supplement (doi:10.3390/molecules22030479), 2017-03-18

Current Data Parameter

NAME  
EXPNO  
PROCNO  
F2 - Acquisition Param  
Date\_ 2012122  
Time 0.4  
INSTRUM spec  
PROBHD 5 mm PABBI 1H  
PULPROG zg3  
TD 6553  
SOLVENT DMS  
NS 3  
DS 12335.52  
SWH 0.18822  
FIDRES 2.654442  
AQ 173.4  
RG 40.53  
DE 6.5  
TE 298.  
D1 1.0000000  
TD0

===== CHANNEL f1 ==  
NUC1 1  
P1 7.9  
PLM1 15.500000  
SF01 600.133706

F2 - Processing param  
SI 6553  
SF 600.130000  
RG 0  
LB 0  
GB 0  
PC 1.0

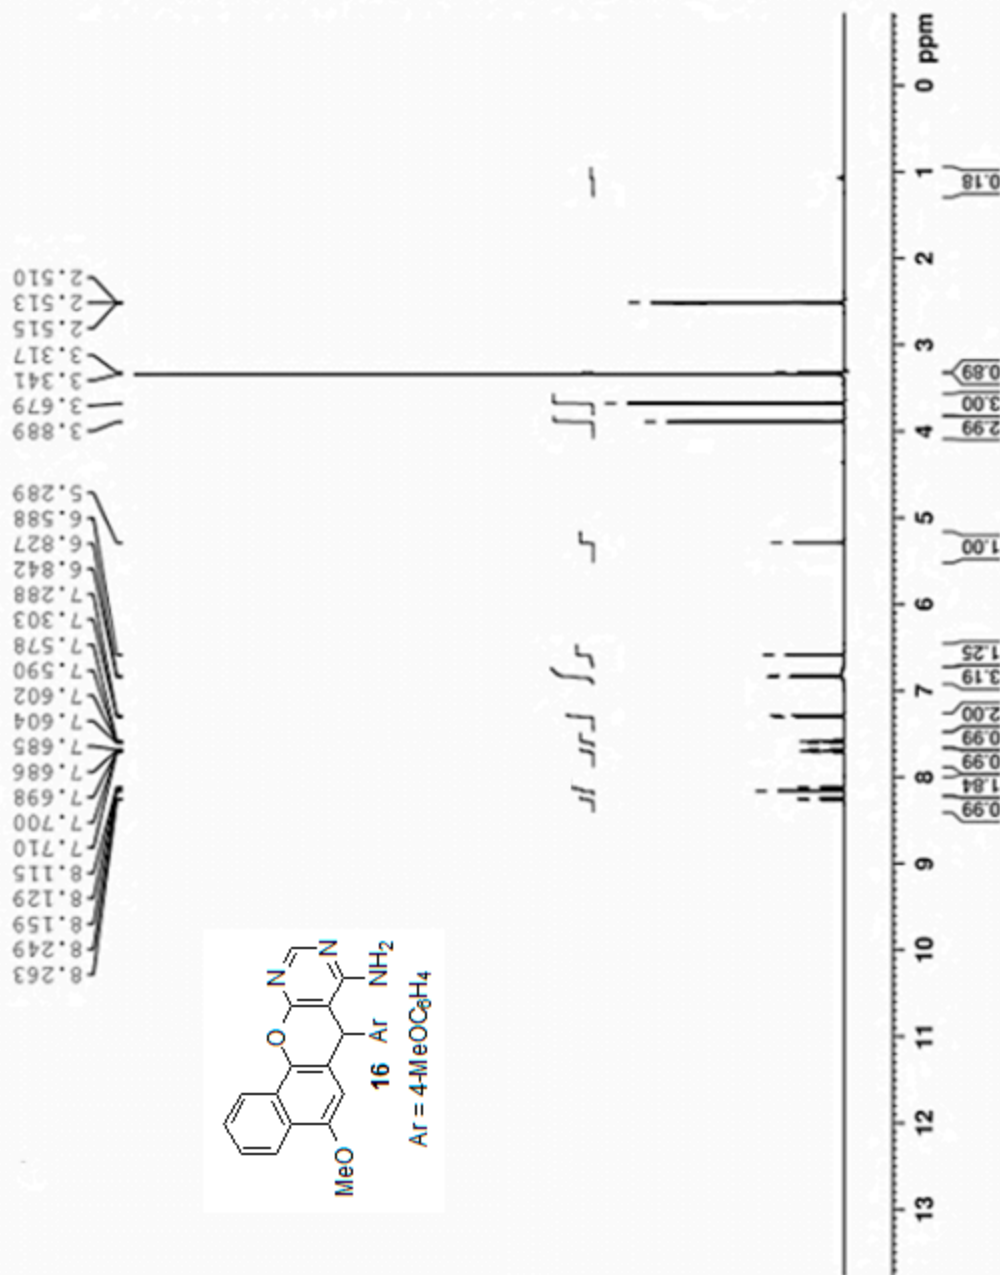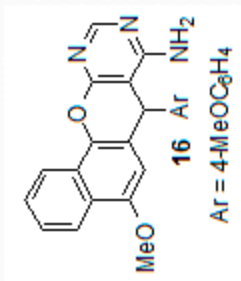

Supplement: s1 [file s1]
