# Supplementary material for: Design of New Benzo[h]chromene Derivatives: Antitumor Activities and Structure-Activity Relationships of the 2,3-Positions and Fused Rings at the 2,3-Positions
Source: MDPI journal article supplement (doi:10.3390/molecules22030479), 2017-03-18
Supplement: s1 [file s1]

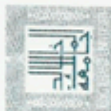

NMR 500 MHz Ultra Shield™

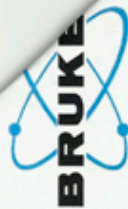

1H (AG-5F)

8.1796  
7.7960  
7.7933  
7.7802  
7.7786  
7.7768  
7.7752  
7.7621  
7.7594  
7.6017  
7.5976  
7.5883  
7.5841  
7.5348  
7.5207  
7.5199  
7.4002  
7.3853  
7.3745  
7.3726  
7.3697  
7.2878  
7.2731  
7.2272  
7.2230  
7.2137  
7.2096  
6.4486  
4.8605  
3.9985  
3.7776  
3.3456  
2.5161  
2.5125  
2.5088

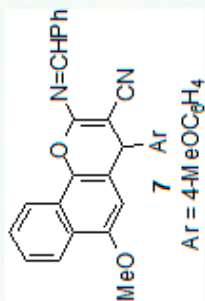

NAME April-2013-mar  
EXPNO 160  
PROCNO 1  
Date\_ 20130412  
Time 4.39  
INSTRUM spect  
PROBHD 5 mm F400 BB-  
PULPROG zgpg30  
TD 65536  
SOLVENT DMSO  
NS 64  
DS 2  
SWH 10330.572 Hz  
FIDRES 0.16225 Hz  
AQ 3.1119223 sec  
RG 203  
DM 48.400 usec  
DE 2.50 usec  
TE 300.2 K  
D1 1.00000000 sec  
TD0 1

===== CHANNEL f1 =====  
NUC1 1H  
P1 14.00 usec  
PL1 0.00 dB  
PL12 12.17047828 W  
SFO1 500.1330885 MHz  
SI 32768  
WDW 500.1300000 MHz  
SSB 0  
LB 0.30 Hz  
GB 0  
PC 1.00

10 9 8 7 6 5 4 3 2 1 0 ppm

0.98  
0.99  
2.14  
2.07  
2.04  
2.11  
1.04  
2.05  
1.00  
2.02  
3.03  
3.00  
24.35  
4.84

ALI ALSHAHRANI
