# Supplementary material for: Design of New Benzo[h]chromene Derivatives: Antitumor Activities and Structure-Activity Relationships of the 2,3-Positions and Fused Rings at the 2,3-Positions
Source: MDPI journal article supplement (doi:10.3390/molecules22030479), 2017-03-18
Supplement: s1 [file s1]

Current Data Parameter  
NAME  
EXPNO  
PROCNO

55.88  
55.80  
55.00  
40.02  
39.16  
39.09  
39.06  
39.03  
39.00  
38.97  
38.94  
38.91  
38.88  
38.85  
38.82  
38.79  
38.76  
38.73  
38.70  
38.67  
38.64  
38.61  
38.58  
38.55  
38.52  
38.49  
38.46  
38.43  
38.40  
38.37  
38.34  
38.31  
38.28  
38.25  
38.22  
38.19  
38.16  
38.13  
38.10  
38.07  
38.04  
38.01  
37.98  
37.95  
37.92  
37.89  
37.86  
37.83  
37.80  
37.77  
37.74  
37.71  
37.68  
37.65  
37.62  
37.59  
37.56  
37.53  
37.50  
37.47  
37.44  
37.41  
37.38  
37.35  
37.32  
37.29  
37.26  
37.23  
37.20  
37.17  
37.14  
37.11  
37.08  
37.05  
37.02  
36.99  
36.96  
36.93  
36.90  
36.87  
36.84  
36.81  
36.78  
36.75  
36.72  
36.69  
36.66  
36.63  
36.60  
36.57  
36.54  
36.51  
36.48  
36.45  
36.42  
36.39  
36.36  
36.33  
36.30  
36.27  
36.24  
36.21  
36.18  
36.15  
36.12  
36.09  
36.06  
36.03  
36.00  
35.97  
35.94  
35.91  
35.88  
35.85  
35.82  
35.79  
35.76  
35.73  
35.70  
35.67  
35.64  
35.61  
35.58  
35.55  
35.52  
35.49  
35.46  
35.43  
35.40  
35.37  
35.34  
35.31  
35.28  
35.25  
35.22  
35.19  
35.16  
35.13  
35.10  
35.07  
35.04  
35.01  
34.98  
34.95  
34.92  
34.89  
34.86  
34.83  
34.80  
34.77  
34.74  
34.71  
34.68  
34.65  
34.62  
34.59  
34.56  
34.53  
34.50  
34.47  
34.44  
34.41  
34.38  
34.35  
34.32  
34.29  
34.26  
34.23  
34.20  
34.17  
34.14  
34.11  
34.08  
34.05  
34.02  
33.99  
33.96  
33.93  
33.90  
33.87  
33.84  
33.81  
33.78  
33.75  
33.72  
33.69  
33.66  
33.63  
33.60  
33.57  
33.54  
33.51  
33.48  
33.45  
33.42  
33.39  
33.36  
33.33  
33.30  
33.27  
33.24  
33.21  
33.18  
33.15  
33.12  
33.09  
33.06  
33.03  
33.00  
32.97  
32.94  
32.91  
32.88  
32.85  
32.82  
32.79  
32.76  
32.73  
32.70  
32.67  
32.64  
32.61  
32.58  
32.55  
32.52  
32.49  
32.46  
32.43  
32.40  
32.37  
32.34  
32.31  
32.28  
32.25  
32.22  
32.19  
32.16  
32.13  
32.10  
32.07  
32.04  
32.01  
31.98  
31.95  
31.92  
31.89  
31.86  
31.83  
31.80  
31.77  
31.74  
31.71  
31.68  
31.65  
31.62  
31.59  
31.56  
31.53  
31.50  
31.47  
31.44  
31.41  
31.38  
31.35  
31.32  
31.29  
31.26  
31.23  
31.20  
31.17  
31.14  
31.11  
31.08  
31.05  
31.02  
30.99  
30.96  
30.93  
30.90  
30.87  
30.84  
30.81  
30.78  
30.75  
30.72  
30.69  
30.66  
30.63  
30.60  
30.57  
30.54  
30.51  
30.48  
30.45  
30.42  
30.39  
30.36  
30.33  
30.30  
30.27  
30.24  
30.21  
30.18  
30.15  
30.12  
30.09  
30.06  
30.03  
30.00  
29.97  
29.94  
29.91  
29.88  
29.85  
29.82  
29.79  
29.76  
29.73  
29.70  
29.67  
29.64  
29.61  
29.58  
29.55  
29.52  
29.49  
29.46  
29.43  
29.40  
29.37  
29.34  
29.31  
29.28  
29.25  
29.22  
29.19  
29.16  
29.13  
29.10  
29.07  
29.04  
29.01  
28.98  
28.95  
28.92  
28.89  
28.86  
28.83  
28.80  
28.77  
28.74  
28.71  
28.68  
28.65  
28.62  
28.59  
28.56  
28.53  
28.50  
28.47  
28.44  
28.41  
28.38  
28.35  
28.32  
28.29  
28.26  
28.23  
28.20  
28.17  
28.14  
28.11  
28.08  
28.05  
28.02  
27.99  
27.96  
27.93  
27.90  
27.87  
27.84  
27.81  
27.78  
27.75  
27.72  
27.69  
27.66  
27.63  
27.60  
27.57  
27.54  
27.51  
27.48  
27.45  
27.42  
27.39  
27.36  
27.33  
27.30  
27.27  
27.24  
27.21  
27.18  
27.15  
27.12  
27.09  
27.06  
27.03  
27.00  
26.97  
26.94  
26.91  
26.88  
26.85  
26.82  
26.79  
26.76  
26.73  
26.70  
26.67  
26.64  
26.61  
26.58  
26.55  
26.52  
26.49  
26.46  
26.43  
26.40  
26.37  
26.34  
26.31  
26.28  
26.25  
26.22  
26.19  
26.16  
26.13  
26.10  
26.07  
26.04  
26.01  
25.98  
25.95  
25.92  
25.89  
25.86  
25.83  
25.80  
25.77  
25.74  
25.71  
25.68  
25.65  
25.62  
25.59  
25.56  
25.53  
25.50  
25.47  
25.44  
25.41  
25.38  
25.35  
25.32  
25.29  
25.26  
25.23  
25.20  
25.17  
25.14  
25.11  
25.08  
25.05  
25.02  
24.99  
24.96  
24.93  
24.90  
24.87  
24.84  
24.81  
24.78  
24.75  
24.72  
24.69  
24.66  
24.63  
24.60  
24.57  
24.54  
24.51  
24.48  
24.45  
24.42  
24.39  
24.36  
24.33  
24.30  
24.27  
24.24  
24.21  
24.18  
24.15  
24.12  
24.09  
24.06  
24.03  
24.00  
23.97  
23.94  
23.91  
23.88  
23.85  
23.82  
23.79  
23.76  
23.73  
23.70  
23.67  
23.64  
23.61  
23.58  
23.55  
23.52  
23.49  
23.46  
23.43  
23.40  
23.37  
23.34  
23.31  
23.28  
23.25  
23.22  
23.19  
23.16  
23.13  
23.10  
23.07  
23.04  
23.01  
22.98  
22.95  
22.92  
22.89  
22.86  
22.83  
22.80  
22.77  
22.74  
22.71  
22.68  
22.65  
22.62  
22.59  
22.56  
22.53  
22.50  
22.47  
22.44  
22.41  
22.38  
22.35  
22.32  
22.29  
22.26  
22.23  
22.20  
22.17  
22.14  
22.11  
22.08  
22.05  
22.02  
21.99  
21.96  
21.93  
21.90  
21.87  
21.84  
21.81  
21.78  
21.75  
21.72  
21.69  
21.66  
21.63  
21.60  
21.57  
21.54  
21.51  
21.48  
21.45  
21.42  
21.39  
21.36  
21.33  
21.30  
21.27  
21.24  
21.21  
21.18  
21.15  
21.12  
21.09  
21.06  
21.03  
21.00  
20.97  
20.94  
20.91  
20.88  
20.85  
20.82  
20.79  
20.76  
20.73  
20.70  
20.67  
20.64  
20.61  
20.58  
20.55  
20.52  
20.49  
20.46  
20.43  
20.40  
20.37  
20.34  
20.31  
20.28  
20.25  
20.22  
20.19  
20.16  
20.13  
20.10  
20.07  
20.04  
20.01  
19.98  
19.95  
19.92  
19.89  
19.86  
19.83  
19.80  
19.77  
19.74  
19.71  
19.68  
19.65  
19.62  
19.59  
19.56  
19.53  
19.50  
19.47  
19.44  
19.41  
19.38  
19.35  
19.32  
19.29  
19.26  
19.23  
19.20  
19.17  
19.14  
19.11  
19.08  
19.05  
19.02  
18.99  
18.96  
18.93  
18.90  
18.87  
18.84  
18.81  
18.78  
18.75  
18.72  
18.69  
18.66  
18.63  
18.60  
18.57  
18.54  
18.51  
18.48  
18.45  
18.42  
18.39  
18.36  
18.33  
18.30  
18.27  
18.24  
18.21  
18.18  
18.15  
18.12  
18.09  
18.06  
18.03  
18.00  
17.97  
17.94  
17.91  
17.88  
17.85  
17.82  
17.79  
17.76  
17.73  
17.70  
17.67  
17.64  
17.61  
17.58  
17.55  
17.52  
17.49  
17.46  
17.43  
17.40  
17.37  
17.34  
17.31  
17.28  
17.25  
17.22  
17.19  
17.16  
17.13  
17.10  
17.07  
17.04  
17.01  
16.98  
16.95  
16.92  
16.89  
16.86  
16.83  
16.80  
16.77  
16.74  
16.71  
16.68  
16.65  
16.62  
16.59  
16.56  
16.53  
16.50  
16.47  
16.44  
16.41  
16.38  
16.35  
16.32  
16.29  
16.26  
16.23  
16.20  
16.17  
16.14  
16.11  
16.08  
16.05  
16.02  
15.99  
15.96  
15.93  
15.90  
15.87  
15.84  
15.81  
15.78  
15.75  
15.72  
15.69  
15.66  
15.63  
15.60  
15.57  
15.54  
15.51  
15.48  
15.45  
15.42  
15.39  
15.36  
15.33  
15.30  
15.27  
15.24  
15.21  
15.18  
15.15  
15.12  
15.09  
15.06  
15.03  
15.00  
14.97  
14.94  
14.91  
14.88  
14.85  
14.82  
14.79  
14.76  
14.73  
14.70  
14.67  
14.64  
14.61  
14.58  
14.55  
14.52  
14.49  
14.46  
14.43  
14.40  
14.37  
14.34  
14.31  
14.28  
14.25  
14.22  
14.19  
14.16  
14.13  
14.10  
14.07  
14.04  
14.01  
13.98  
13.95  
13.92  
13.89  
13.86  
13.83  
13.80  
13.77  
13.74  
13.71  
13.68  
13.65  
13.62  
13.59  
13.56  
13.53  
13.50  
13.47  
13.44  
13.41  
13.38  
13.35  
13.32  
13.29  
13.26  
13.23  
13.20  
13.17  
13.14  
13.11  
13.08  
13.05  
13.02  
12.99  
12.96  
12.93  
12.90  
12.87  
12.84  
12.81  
12.78  
12.75  
12.72  
12.69  
12.66  
12.63  
12.60  
12.57  
12.54  
12.51  
12.48  
12.45  
12.42  
12.39  
12.36  
12.33  
12.30  
12.27  
12.24  
12.21  
12.18  
12.15  
12.12  
12.09  
12.06  
12.03  
12.00  
11.97  
11.94  
11.91  
11.88  
11.85  
11.82  
11.79  
11.76  
11.73  
11.70  
11.67  
11.64  
11.61  
11.58  
11.55  
11.52  
11.49  
11.46  
11.43  
11.40  
11.37  
11.34  
11.31  
11.28  
11.25  
11.22  
11.19  
11.16  
11.13  
11.10  
11.07  
11.04  
11.01  
10.98  
10.95  
10.92  
10.89  
10.86  
10.83  
10.80  
10.77  
10.74  
10.71  
10.68  
10.65  
10.62  
10.59  
10.56  
10.53  
10.50  
10.47  
10.44  
10.41  
10.38  
10.35  
10.32  
10.29  
10.26  
10.23  
10.20  
10.17  
10.14  
10.11  
10.08  
10.05  
10.02  
9.99  
9.96  
9.93  
9.90  
9.87  
9.84  
9.81  
9.78  
9.75  
9.72  
9.69  
9.66  
9.63  
9.60  
9.57  
9.54  
9.51  
9.48  
9.45  
9.42  
9.39  
9.36  
9.33  
9.30  
9.27  
9.24  
9.21  
9.18  
9.15  
9.12  
9.09  
9.06  
9.03  
9.00  
8.97  
8.94  
8.91  
8.88  
8.85  
8.82  
8.79  
8.76  
8.73  
8.70  
8.67  
8.64  
8.61  
8.58  
8.55  
8.52  
8.49  
8.46  
8.43  
8.40  
8.37  
8.34  
8.31  
8.28  
8.25  
8.22  
8.19  
8.16  
8.13  
8.10  
8.07  
8.04  
8.01  
7.98  
7.95  
7.92  
7.89  
7.86  
7.83  
7.80  
7.77  
7.74  
7.71  
7.68  
7.65  
7.62  
7.59  
7.56  
7.53  
7.50  
7.47  
7.44  
7.41  
7.38  
7.35  
7.32  
7.29  
7.26  
7.23  
7.20  
7.17  
7.14  
7.11  
7.08  
7.05  
7.02  
6.99  
6.96  
6.93  
6.90  
6.87  
6.84  
6.81  
6.78  
6.75  
6.72  
6.69  
6.66  
6.63  
6.60  
6.57  
6.54  
6.51  
6.48  
6.45  
6.42  
6.39  
6.36  
6.33  
6.30  
6.27  
6.24  
6.21  
6.18  
6.15  
6.12  
6.09  
6.06  
6.03  
6.00  
5.97  
5.94  
5.91  
5.88  
5.85  
5.82  
5.79  
5.76  
5.73  
5.70  
5.67  
5.64  
5.61  
5.58  
5.55  
5.52  
5.49  
5.46  
5.43  
5.40  
5.37  
5.34  
5.31  
5.28  
5.25  
5.22  
5.19  
5.16  
5.13  
5.10  
5.07  
5.04  
5.01  
4.98  
4.95  
4.92  
4.89  
4.86  
4.83  
4.80  
4.77  
4.74  
4.71  
4.68  
4.65  
4.62  
4.59  
4.56  
4.53  
4.50  
4.47  
4.44  
4.41  
4.38  
4.35  
4.32  
4.29  
4.26  
4.23  
4.20  
4.17  
4.14  
4.11  
4.08  
4.05  
4.02  
3.99  
3.96  
3.93  
3.90  
3.87  
3.84  
3.81  
3.78  
3.75  
3.72  
3.69  
3.66  
3.63  
3.60  
3.57  
3.54  
3.51  
3.48  
3.45  
3.42  
3.39  
3.36  
3.33  
3.30  
3.27  
3.24  
3.21  
3.18  
3.15  
3.12  
3.09  
3.06  
3.03  
3.00  
2.97  
2.94  
2.91  
2.88  
2.85  
2.82  
2.79  
2.76  
2.73  
2.70  
2.67  
2.64  
2.61  
2.58  
2.55  
2.52  
2.49  
2.46  
2.43  
2.40  
2.37  
2.34  
2.31  
2.28  
2.25  
2.22  
2.19  
2.16  
2.13  
2.10  
2.07  
2.04  
2.01  
1.98  
1.95  
1.92  
1.89  
1.86  
1.83  
1.80  
1.77  
1.74  
1.71  
1.68  
1.65  
1.62  
1.59  
1.56  
1.53  
1.50  
1.47  
1.44  
1.41  
1.38  
1.35  
1.32  
1.29  
1.26  
1.23  
1.20  
1.17  
1.14  
1.11  
1.08  
1.05  
1.02  
1.00  
0.97  
0.94  
0.91  
0.88  
0.85  
0.82  
0.79  
0.76  
0.73  
0.70  
0.67  
0.64  
0.61  
0.58  
0.55  
0.52  
0.49  
0.46  
0.43  
0.40  
0.37  
0.34  
0.31  
0.28  
0.25  
0.22  
0.19  
0.16  
0.13  
0.10  
0.07  
0.04  
0.01  
0.00  
-0.03  
-0.06  
-0.09  
-0.12  
-0.15  
-0.18  
-0.21  
-0.24  
-0.27  
-0.30  
-0.33  
-0.36  
-0.39  
-0.42  
-0.45  
-0.48  
-0.51  
-0.54  
-0.57  
-0.60  
-0.63  
-0.66  
-0.69  
-0.72  
-0.75  
-0.78  
-0.81  
-0.84  
-0.87  
-0.90  
-0.93  
-0.96  
-0.99  
-1.02  
-1.05  
-1.08  
-1.11  
-1.14  
-1.17  
-1.20  
-1.23  
-1.26  
-1.29  
-1.32  
-1.35  
-1.38  
-1.41  
-1.44  
-1.47  
-1.50  
-1.53  
-1.56  
-1.59  
-1.62  
-1.65  
-1.68  
-1.71  
-1.74  
-1.77  
-1.80  
-1.83  
-1.86  
-1.89  
-1.92  
-1.95  
-1.98  
-2.01  
-2.04  
-2.07  
-2.10  
-2.13  
-2.16  
-2.19  
-2.22  
-2.25  
-2.28  
-2.31  
-2.34  
-2.37  
-2.40  
-2.43  
-2.46  
-2.49  
-2.52  
-2.55  
-2.58  
-2.61  
-2.64  
-2.67  
-2.70  
-2.73  
-2.76  
-2.79  
-2.82  
-2.85  
-2.88  
-2.91  
-2.94  
-2.97  
-3.00  
-3.03  
-3.06  
-3.09  
-3.12  
-3.15  
-3.18  
-3.21  
-3.24  
-3.27  
-3.30  
-3.33  
-3.36  
-3.39  
-3.42  
-3.45  
-3.48  
-3.51  
-3.54  
-3.57  
-3.60  
-3.63  
-3.66  
-3.69  
-3.72  
-3.75  
-3.78  
-3.81  
-3.84  
-3.87  
-3.90  
-3.93  
-3.96  
-3.99  
-4.02  
-4.05  
-4.08  
-4.11  
-4.14  
-4.17  
-4.20  
-4.23  
-4.26  
-4.29  
-4.32  
-4.35  
-4.38  
-4.41  
-4.44  
-4.47  
-4.50  
-4.53  
-4.56  
-4.59  
-4.62  
-4.65  
-4.68  
-4.71  
-4.74  
-4.77  
-4.80  
-4.83  
-4.86  
-4.89  
-4.92  
-4.95  
-4.98  
-5.01  
-5.04  
-5.07  
-5.10  
-5.13  
-5.16  
-5.19  
-5.22  
-5.25  
-5.28  
-5.31  
-5.34  
-5.37  
-5.40  
-5.43  
-5.46  
-5.49  
-5.52  
-5.55  
-5.58  
-5.61  
-5.64  
-5.67  
-5.70  
-5.73  
-5.76  
-5.79  
-5.82  
-5.85  
-5.88  
-5.91  
-5.94  
-5.97  
-6.00  
-6.03  
-6.06  
-6.09  
-6.12  
-6.15  
-6.18  
-6.21  
-6.24  
-6.27  
-6.30  
-6.33  
-6.36  
-6.39  
-6.42  
-6.45  
-6.48  
-6.51  
-6.54  
-6.57  
-6.60  
-6.63  
-6.66  
-6.69  
-6.72  
-6.75  
-6.78  
-6.81  
-6.84  
-6.87  
-6.90  
-6.93  
-6.96  
-6.99  
-7.02  
-7.05  
-7.08  
-7.11  
-7.14  
-7.17  
-7.20  
-7.23  
-7.26  
-7.29  
-7.32  
-7.35  
-7.38  
-7.41  
-7.44  
-7.47  
-7.50  
-7.53  
-7.56  
-7.59  
-7.62  
-7.65  
-7.68  
-7.71  
-7.74  
-7.77  
-7.80  
-7.83  
-7.86  
-7.89  
-7.92  
-7.95  
-7.98  
-8.01  
-8.04  
-8.07  
-8.10  
-8.13  
-8.16  
-8.19  
-8.22  
-8.25  
-8.28  
-8.31  
-8.34  
-8.37  
-8.40  
-8.43  
-8.46  
-8.49  
-8.52  
-8.55  
-8.58  
-8.61  
-8.64  
-8.67  
-8.70  
-8.73  
-8.76  
-8.79  
-8.82  
-8.85  
-8.88  
-8.91  
-8.94  
-8.97  
-9.00  
-9.03  
-9.06  
-9.09  
-9.12  
-9.15  
-9.18  
-9.21  
-9.24  
-9.27  
-9.30  
-9.33  
-9.36  
-9.39  
-9.42  
-9.45  
-9.48  
-9.51  
-9.54  
-9.57  
-9.60  
-9.63  
-9.66  
-9.69  
-9.72  
-9.75  
-9.78  
-9.81  
-9.84  
-9.87  
-9.90  
-9.93  
-9.96  
-10.00  
-10.03  
-10.06  
-10.09  
-10.12  
-10.15  
-10.18  
-10.21  
-10.24  
-10.27  
-10.30  
-10.33  
-10.36  
-10.39  
-10.42  
-10.45  
-10.48  
-10.51  
-10.54  
-10.57  
-10.60  
-10.63  
-10.66  
-10.69  
-10.72  
-10.75  
-10.78  
-10.81  
-10.84  
-10.87  
-10.90  
-10.93  
-10.96  
-10.99  
-11.02  
-11.05  
-11.08  
-11.11  
-11.14  
-11.17  
-11.20  
-11.23  
-11.26  
-11.29  
-11.32  
-11.35  
-11.38  
-11.41  
-11.44  
-11.47  
-11.50  
-11.53  
-11.56  
-11.59  
-11.62  
-11.65  
-11.68  
-11.71  
-11.74  
-11.77  
-11.80  
-11.83  
-11.86  
-11.89  
-11.92  
-11.95  
-11.98  
-12.01  
-12.04  
-12.07  
-12.10  
-12.13  
-12.16  
-12.19  
-12.22  
-12.25  
-12.28  
-12.31  
-12.34  
-12.37  
-12.40  
-12.43  
-12.46  
-12.49  
-12.52  
-12.55  
-12.58  
-12.61  
-12.64  
-12.67  
-12.70  
-12.73  
-12.76  
-12.79  
-12.82  
-12.85  
-12.88  
-12.91  
-12.94  
-12.97  
-13.00  
-13.03  
-13.06  
-13.09  
-13.12  
-13.15  
-13.18  
-13.21  
-13.24  
-13.27  
-13.30  
-13.33  
-13.36  
-13.39  
-13.42  
-13.45  
-13.48  
-13.51  
-13.54  
-13.57  
-13.60  
-13.63  
-13.66  
-13.69  
-13.72  
-13.75  
-13.78  
-13.81  
-13.84  
-13.87  
-13.90  
-13.93  
-13.96  
-13.99  
-14.02  
-14.05  
-14.08  
-14.11  
-14.14  
-14.17  
-14.20  
-14.23  
-14.26  
-
