# Supplementary material for: Design of New Benzo[h]chromene Derivatives: Antitumor Activities and Structure-Activity Relationships of the 2,3-Positions and Fused Rings at the 2,3-Positions
Source: MDPI journal article supplement (doi:10.3390/molecules22030479), 2017-03-18

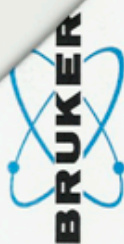

NMR 500 MHz Ultra Shield™

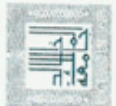

<sup>1</sup>H (AG-6F)

8.1418  
8.1401  
8.1241  
8.1227  
8.6851  
7.6830  
7.6800  
7.6660  
7.6347  
7.6179  
7.6157  
7.3940  
7.3899  
7.3805  
7.3765  
6.9801  
6.9760  
6.9666  
6.9626  
6.5299  
5.2909

3.8389  
3.7533  
3.3582  
2.5161  
2.5125  
2.5089  
2.4738

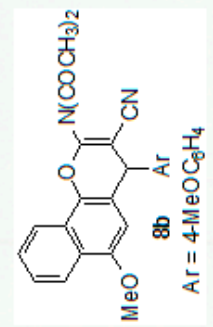

NAME April-2013-nmr  
EXPNO 130  
PROCNO 1  
Date\_ 20130412  
Time 0.40  
INSTRUM spect  
PROBHD 5 mm PABBO  
PULPROG zgpg30  
TD 65536  
SOLVENT DMSO  
DS 64  
SWH 10330.578 Hz  
FIDRES 0.157632 Hz  
AQ 3.1719223 sec  
RG 144  
EW 48.400 usec  
DE 6.50 usec  
TE 267.7 K  
D1 1.00000000 sec  
TDO 1  
===== CHANNEL f1 =====  
NUC1 <sup>1</sup>H  
P1 14.00 usec  
PL1 0.00 dB  
PLN 12.17042000 dB  
SFO1 500.1330885 MHz  
SI 32768  
SF 500.1300000 MHz  
WDW EM  
SSB 0  
LB 0.30 Hz  
GB 0  
PC 1.00

ALI ALSHAHRANI

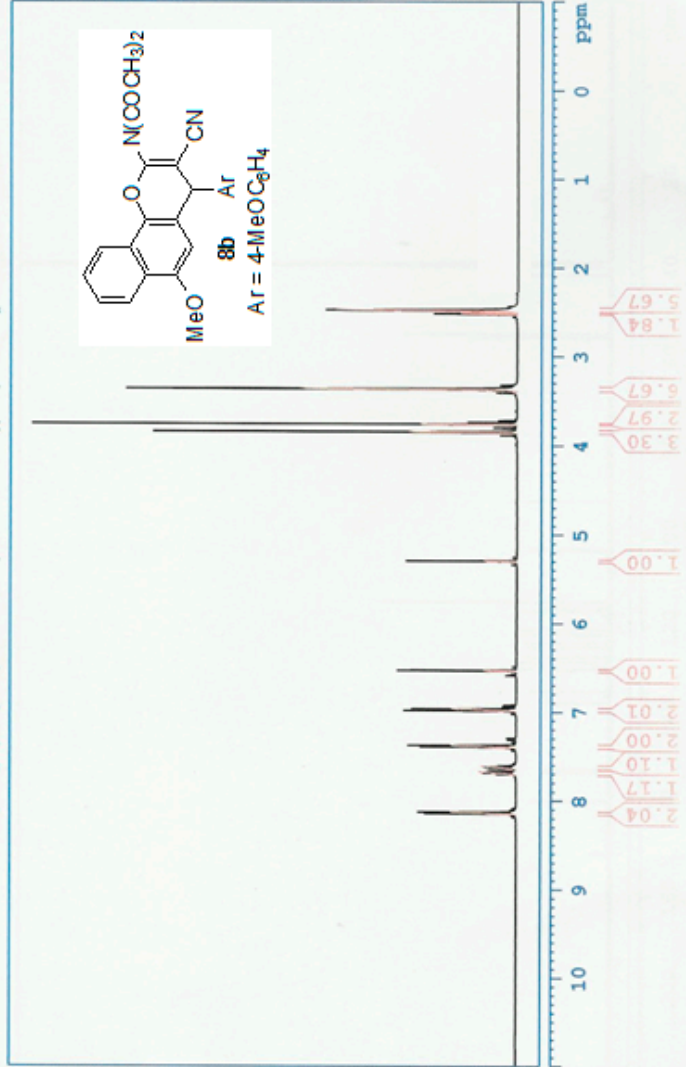

Supplement: s1 [file s1]
