# Supplementary material for: Design of New Benzo[h]chromene Derivatives: Antitumor Activities and Structure-Activity Relationships of the 2,3-Positions and Fused Rings at the 2,3-Positions
Source: MDPI journal article supplement (doi:10.3390/molecules22030479), 2017-03-18
Supplement: s1 [file s1]

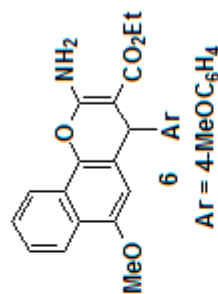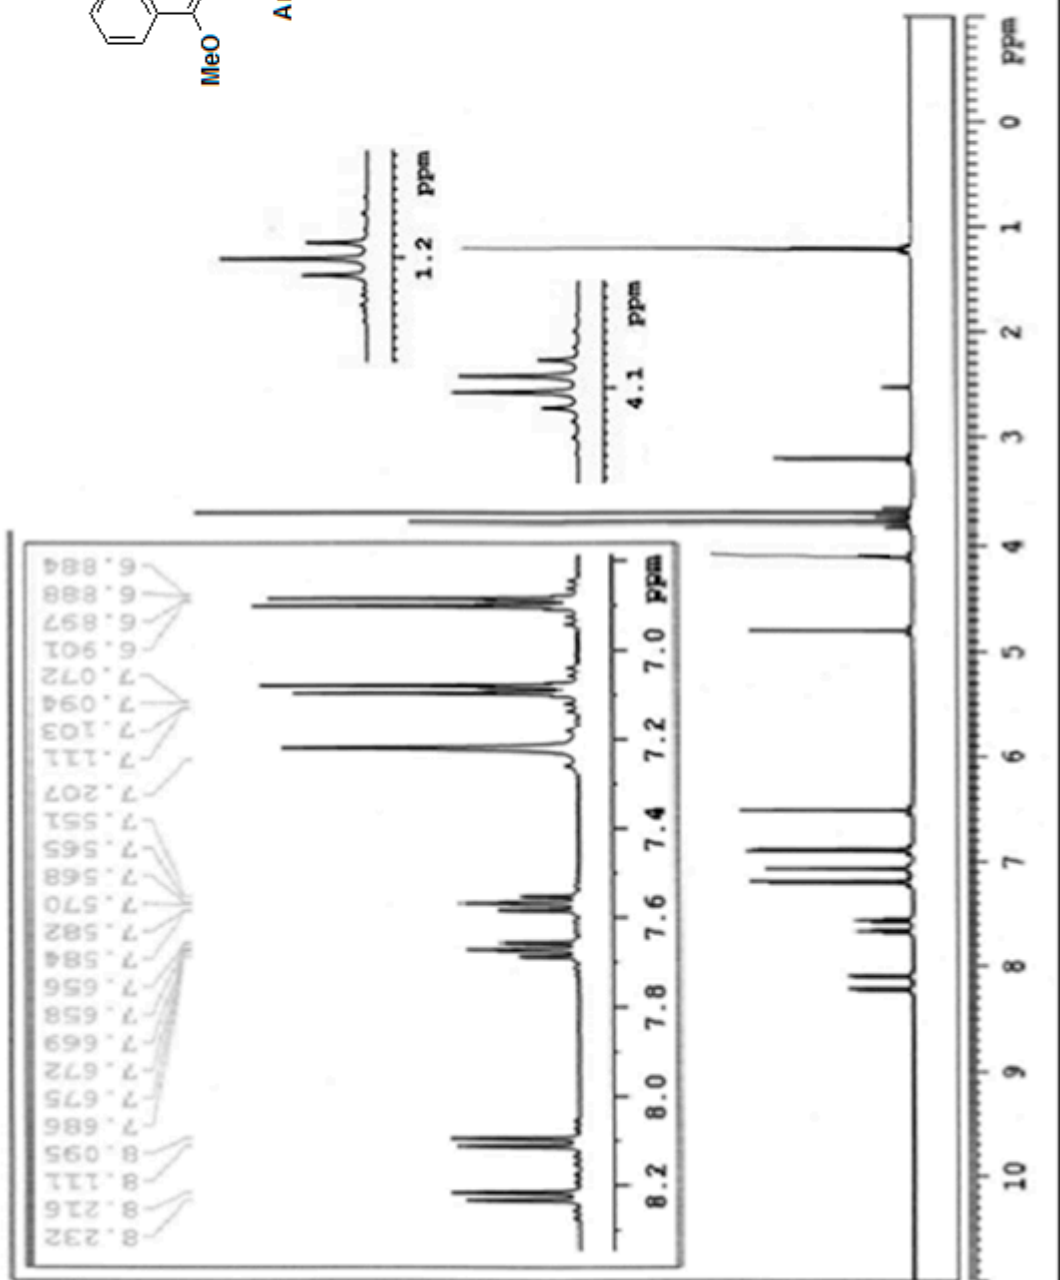

NAME: 2012-09-20-08  
 EXPNO: 10  
 PROCNO: 1  
 Data: 20120110  
 Time: 4.12  
 INSTRUM: spect  
 FPROBHD: 5 mm WALTZ-BB-  
 PULPROG: zg30  
 TD: 65536  
 SOLVENT: DMSO  
 NS: 64  
 DS: 2  
 SWH: 10330.576 Hz  
 FIDRES: 0.151632 Hz  
 AQ: 3.1719923 sec  
 RG: 71.8  
 DN: 18.400 URB  
 DE: 6.50 usec  
 TE: 300.2 K  
 D1: 1.00000000 sec  
 TDO: 1

CHANNEL F1  
 NUC1: 1H  
 P1: 14.00 usec  
 PL1: 0.00 dB  
 FAL: 31.40 dB  
 SFO1: 12.17942828 MHz  
 SFO2: 500.1350845 MHz  
 SI: 32768  
 SF: 500.1299945 MHz  
 SWH: 0  
 DS: 0  
 LB: 0.30 Hz  
 GB: 0  
 PC: 1.00
