# Supplementary material for: Design of New Benzo[h]chromene Derivatives: Antitumor Activities and Structure-Activity Relationships of the 2,3-Positions and Fused Rings at the 2,3-Positions
Source: MDPI journal article supplement (doi:10.3390/molecules22030479), 2017-03-18
Supplement: s1 [file s1]

Current Data Parameters  
NAME  
EXPNO  
PROCNO

F2 - Acquisition Parameters  
Date\_ 201212  
Time 12.1  
INSTRUM spect  
PROBHD 5 mm PABBI 11  
PULPROG zgpg  
TD 32768  
SOLVENT DMS  
NS 61  
DS 4  
SWH 34722.2  
FIDRES 1.0596  
AQ 0.47190  
RG 173  
DM 14.4  
DE 6  
TE 298  
D1 2.000000  
D11 0.030000  
TD0

===== CHANNEL f1 ==  
NUC1 13  
P1 14  
PLW1 101.000000  
SFO1 150.919401

===== CHANNEL f2 ==  
CPOPRG2 waltz  
NUC2 13  
PCPD2 70  
PLW2 15.500000  
PLW12 0.197420  
PLW13 0.096736  
SFO2 600.131911

F2 - Processing Parameters  
SI 32768  
SF 150.902881  
WDW 0  
SSB 0  
LB 1.1  
GB 0  
FC 1.1

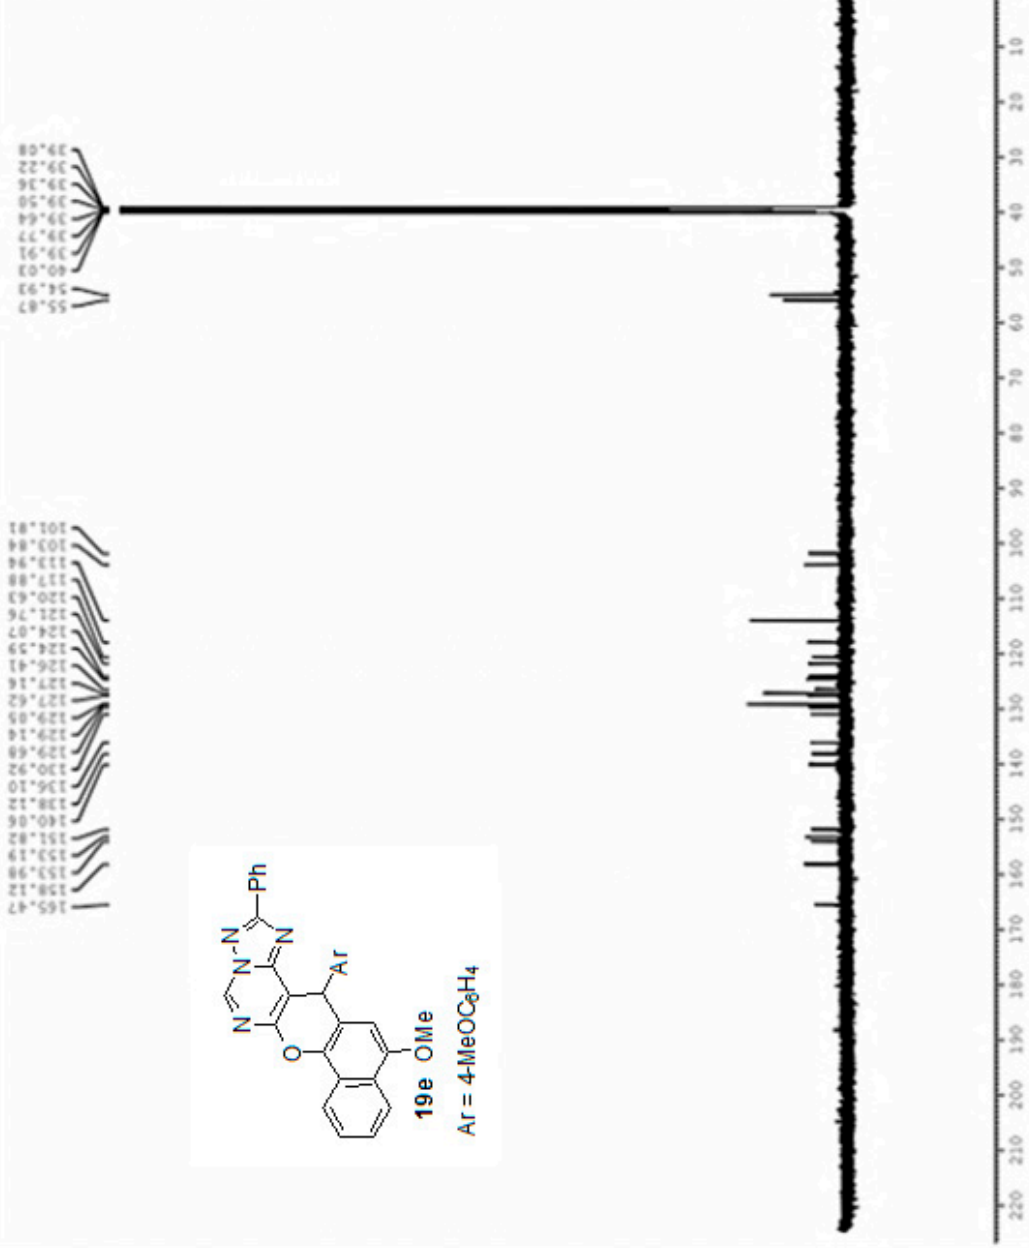

165.4  
158.6  
153.3  
152.1  
147.1  
143.1  
141.1  
139.1  
138.1  
136.1  
135.1  
134.1  
133.1  
132.1  
131.1  
130.1  
129.1  
128.1  
127.1  
126.1  
125.1  
124.1  
123.1  
122.1  
121.1  
120.1  
119.1  
118.1  
117.1  
116.1  
115.1  
114.1  
113.1  
112.1  
111.1  
110.1  
109.1  
108.1  
107.1  
106.1  
105.1  
104.1  
103.1  
102.1  
101.1  
100.1  
99.1  
98.1  
97.1  
96.1  
95.1  
94.1  
93.1  
92.1  
91.1  
90.1  
89.1  
88.1  
87.1  
86.1  
85.1  
84.1  
83.1  
82.1  
81.1  
80.1  
79.1  
78.1  
77.1  
76.1  
75.1  
74.1  
73.1  
72.1  
71.1  
70.1  
69.1  
68.1  
67.1  
66.1  
65.1  
64.1  
63.1  
62.1  
61.1  
60.1  
59.1  
58.1  
57.1  
56.1  
55.1  
54.1  
53.1  
52.1  
51.1  
50.1  
49.1  
48.1  
47.1  
46.1  
45.1  
44.1  
43.1  
42.1  
41.1  
40.1  
39.1  
38.1  
37.1  
36.1  
35.1  
34.1  
33.1  
32.1  
31.1  
30.1  
29.1

8.0  
7.9  
7.8  
7.7  
7.6  
7.5  
7.4  
7.3  
7.2  
7.1  
7.0  
6.9  
6.8  
6.7  
6.6  
6.5  
6.4  
6.3  
6.2  
6.1  
6.0  
5.9  
5.8  
5.7  
5.6  
5.5  
5.4  
5.3  
5.2  
5.1  
5.0  
4.9
