# Supplementary figures and images for: Design of New Benzo[h]chromene Derivatives: Antitumor Activities and Structure-Activity Relationships of the 2,3-Positions and Fused Rings at the 2,3-Positions
Source: MDPI journal article supplement (doi:10.3390/molecules22030479), 2017-03-18

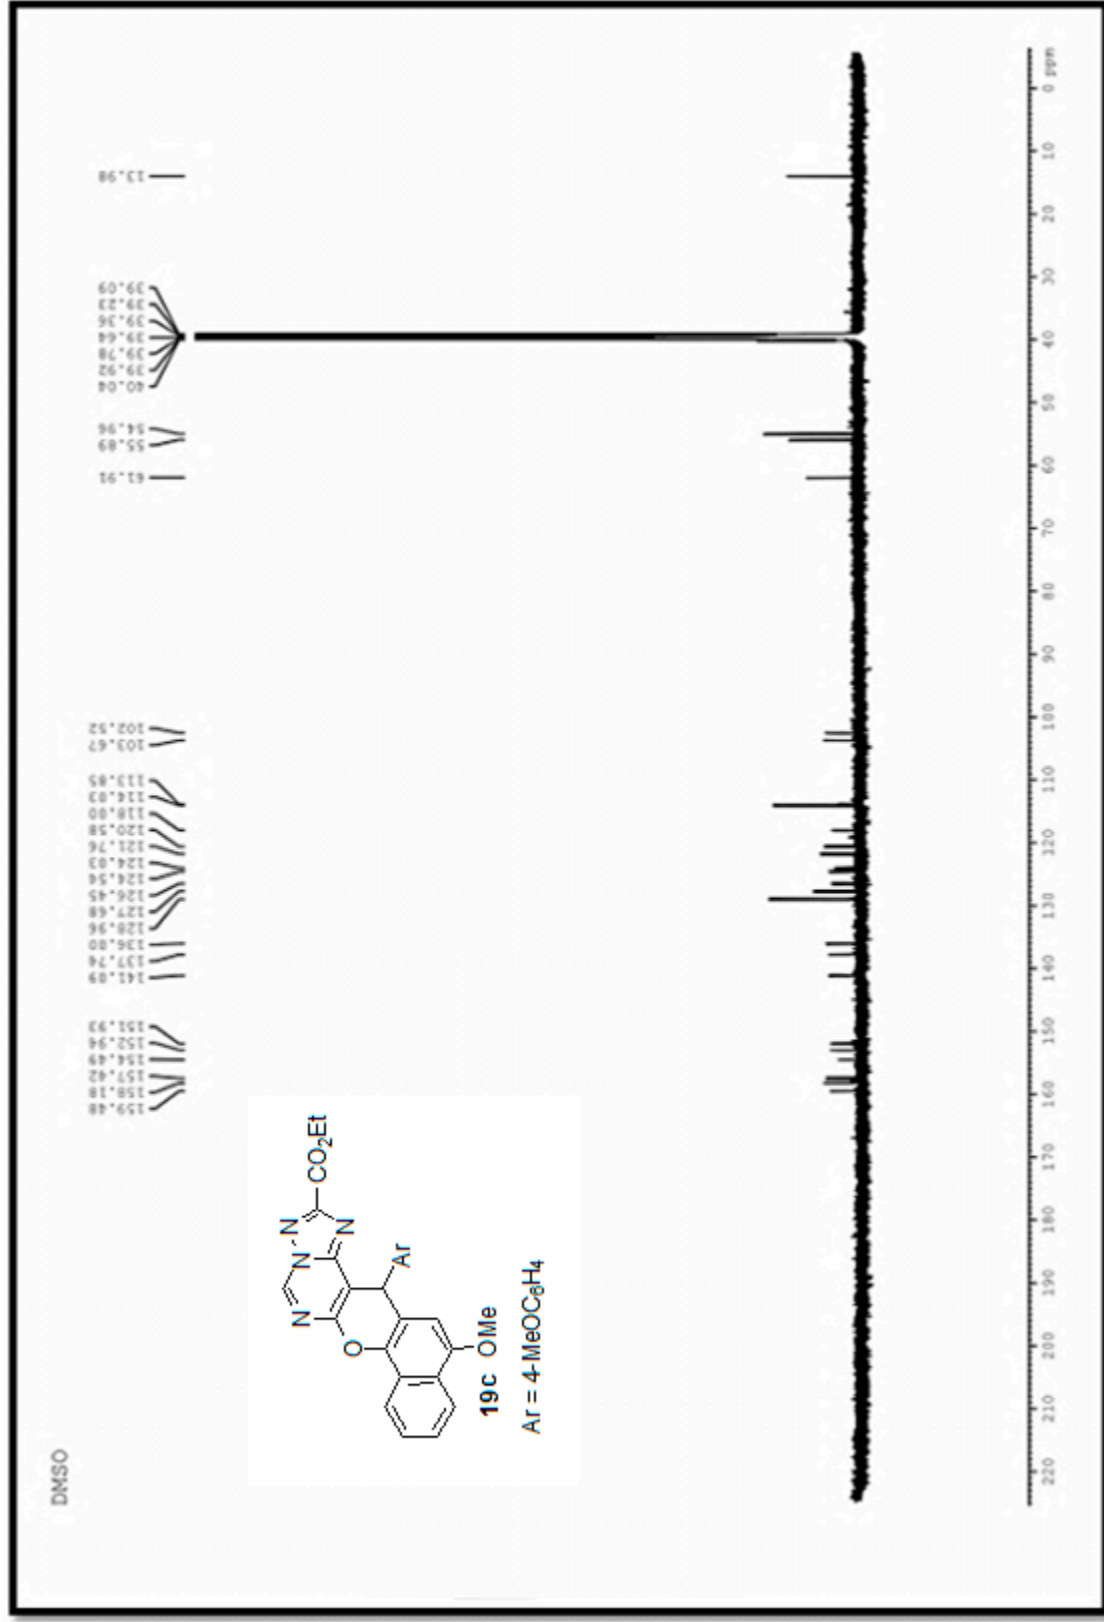

Supplement: s1 [file s1]

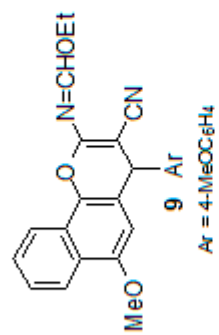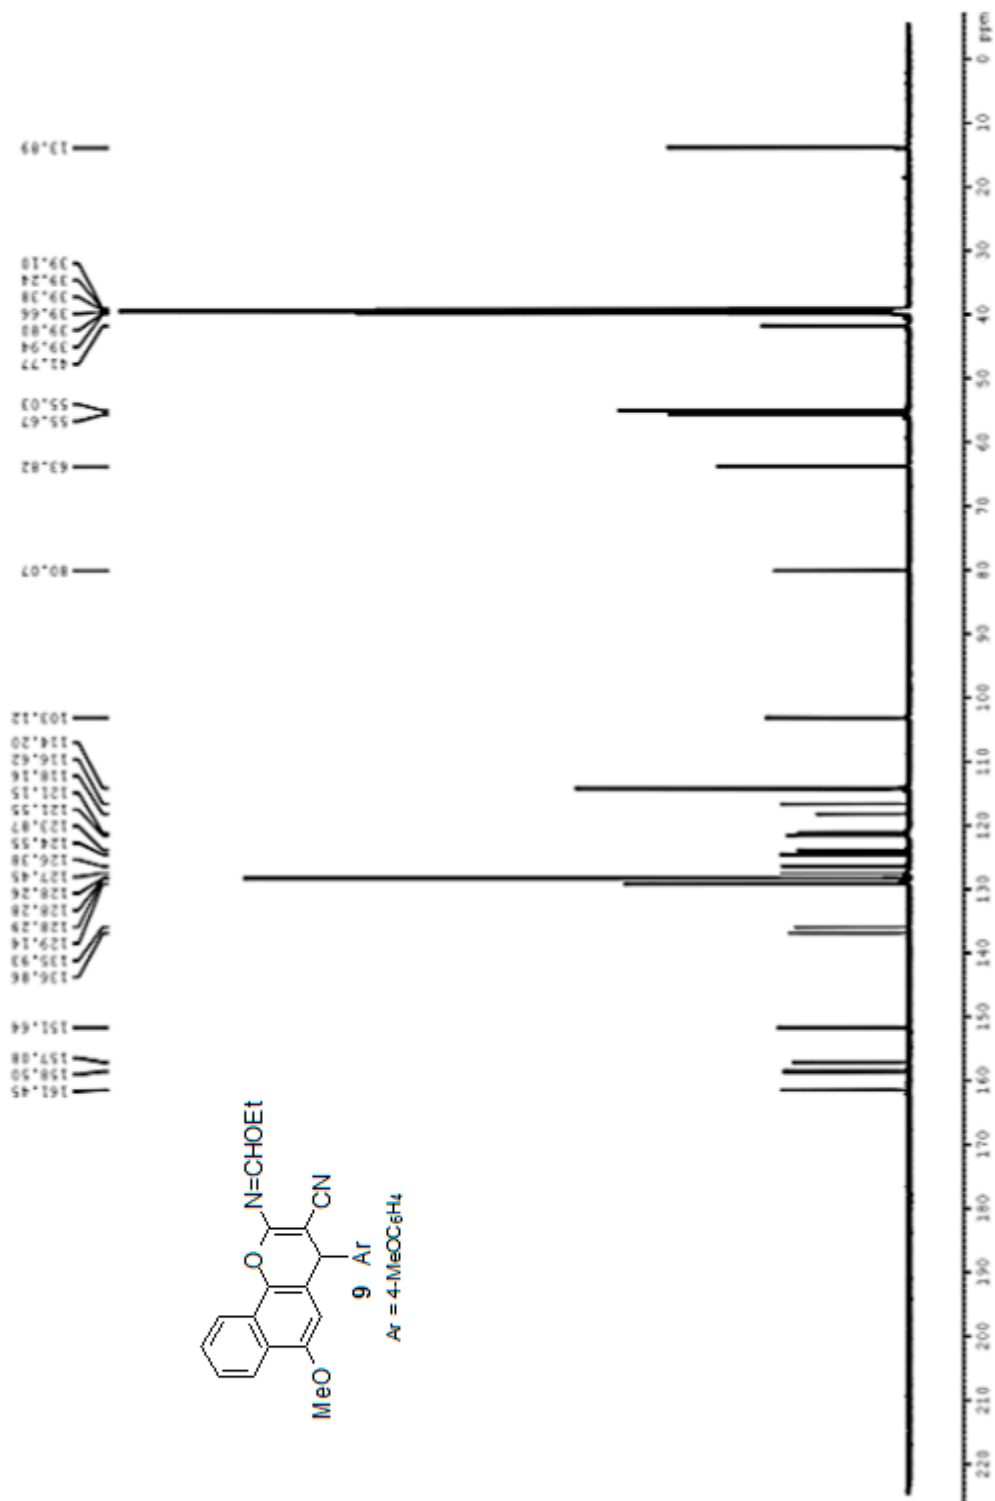

Supplement: s1 [file s1]

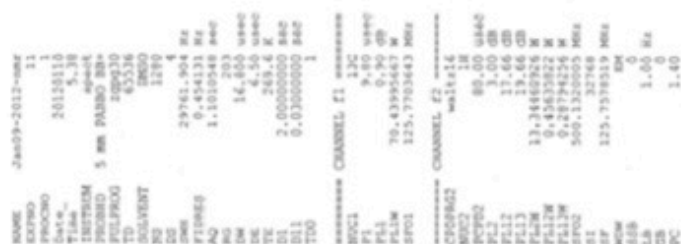

Supplement: s1 [file s1]

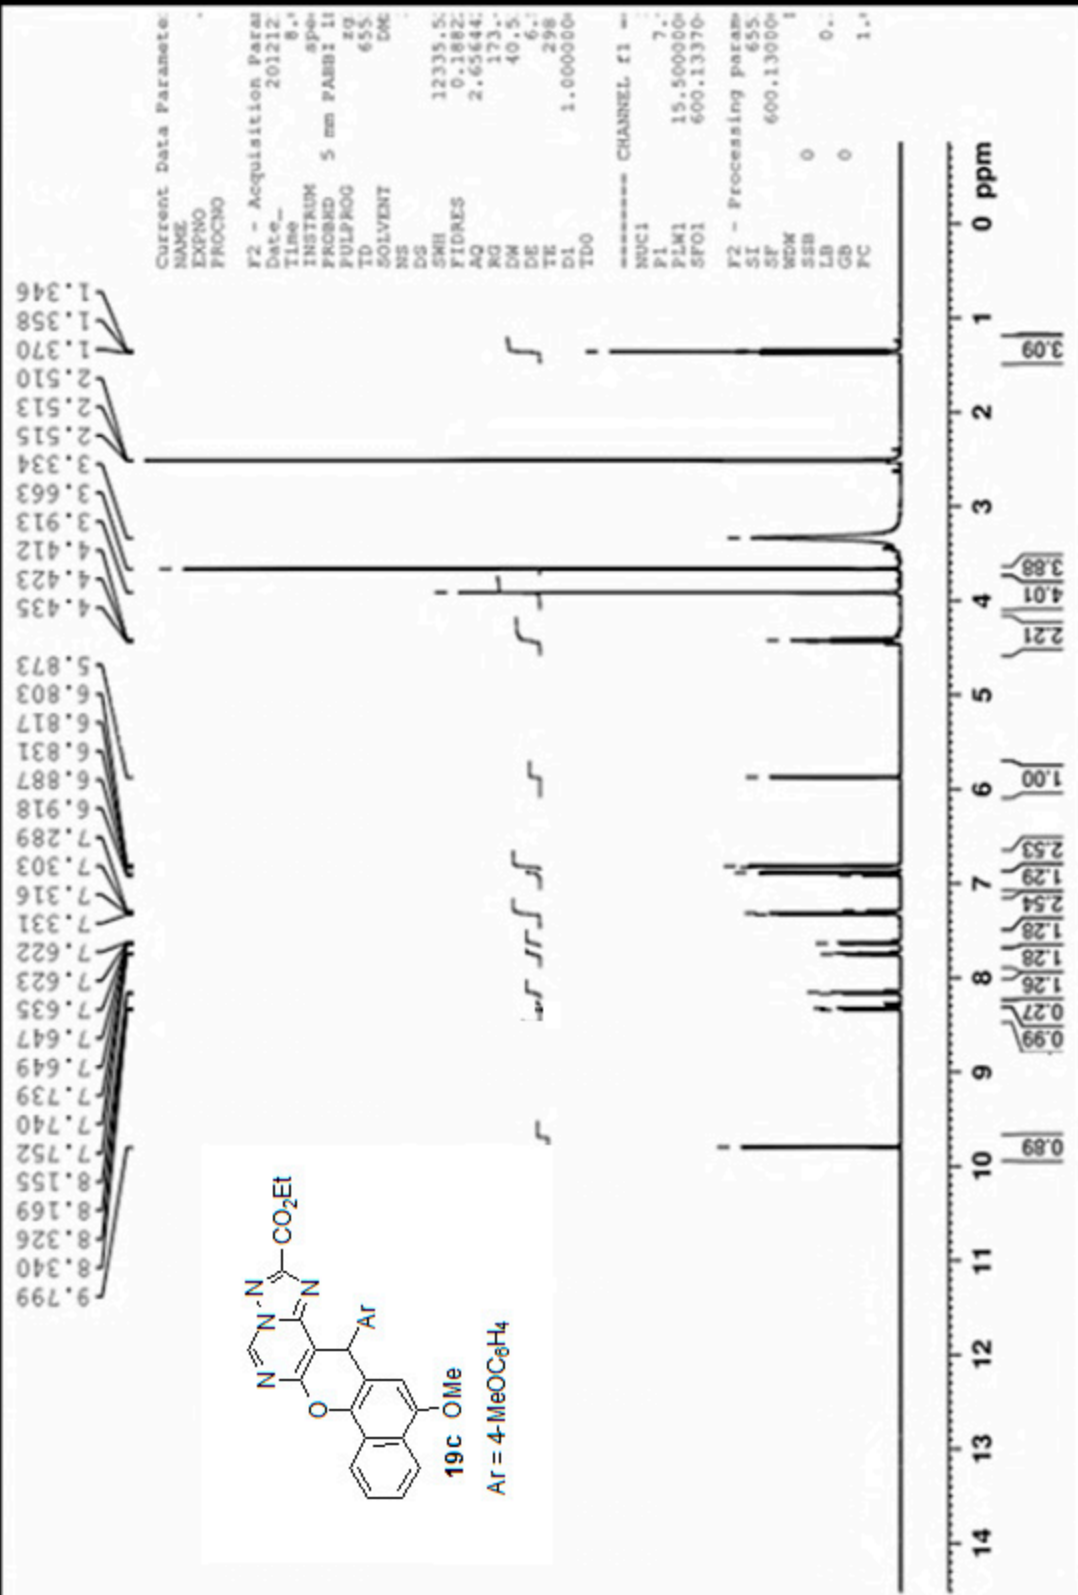

Supplement: s1 [file s1]

DMSO

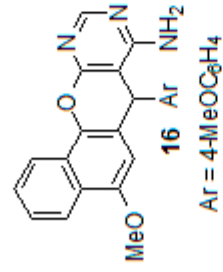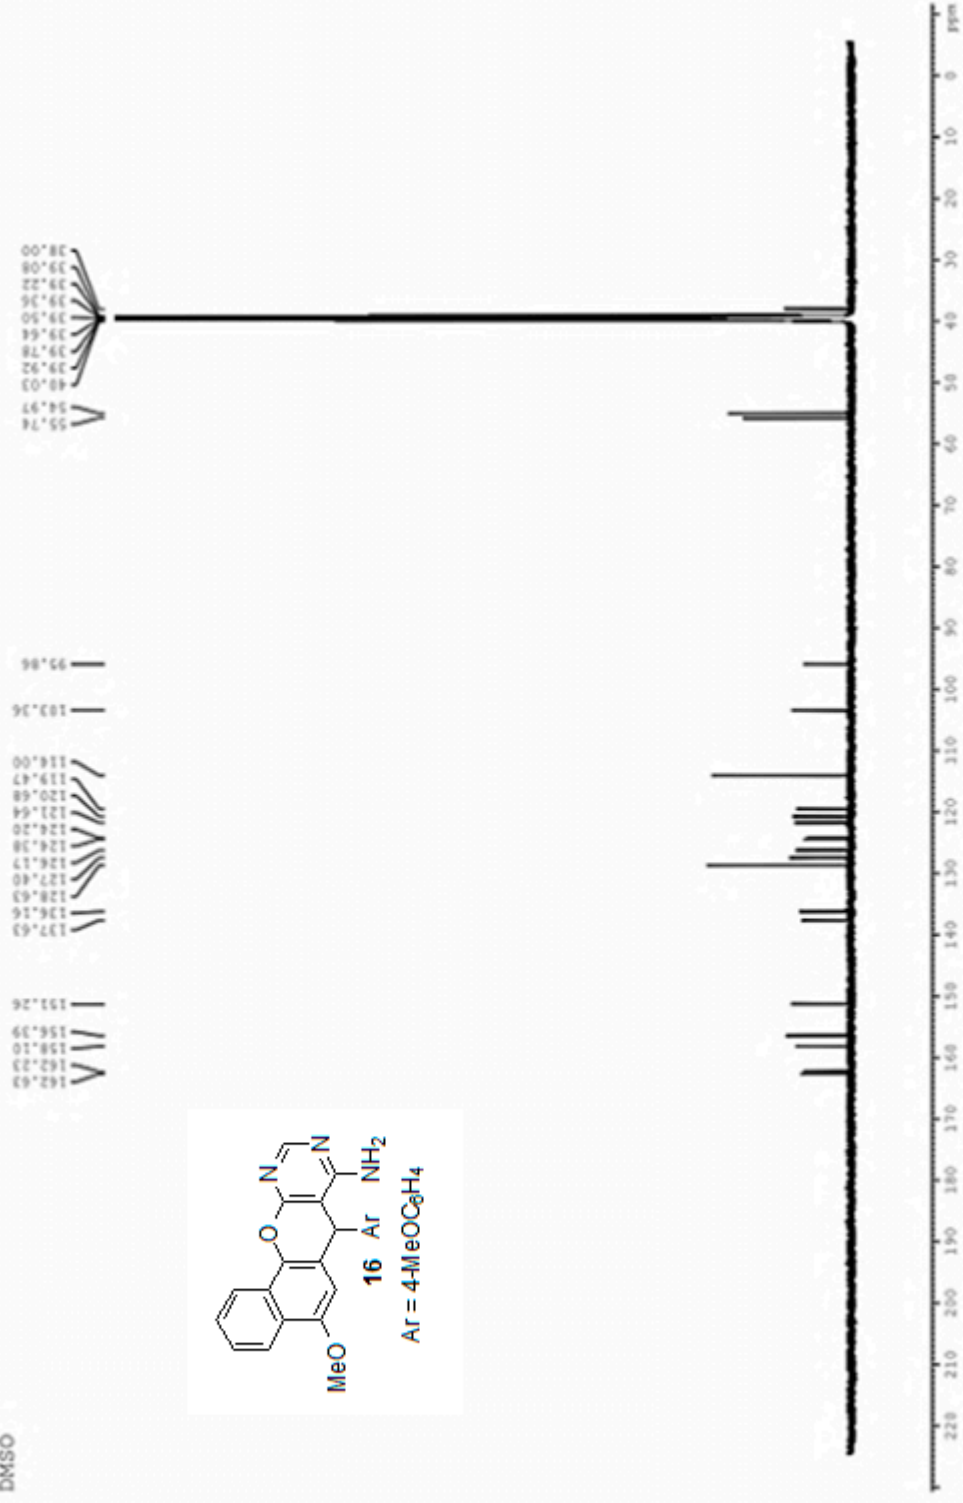

Supplement: s1 [file s1]

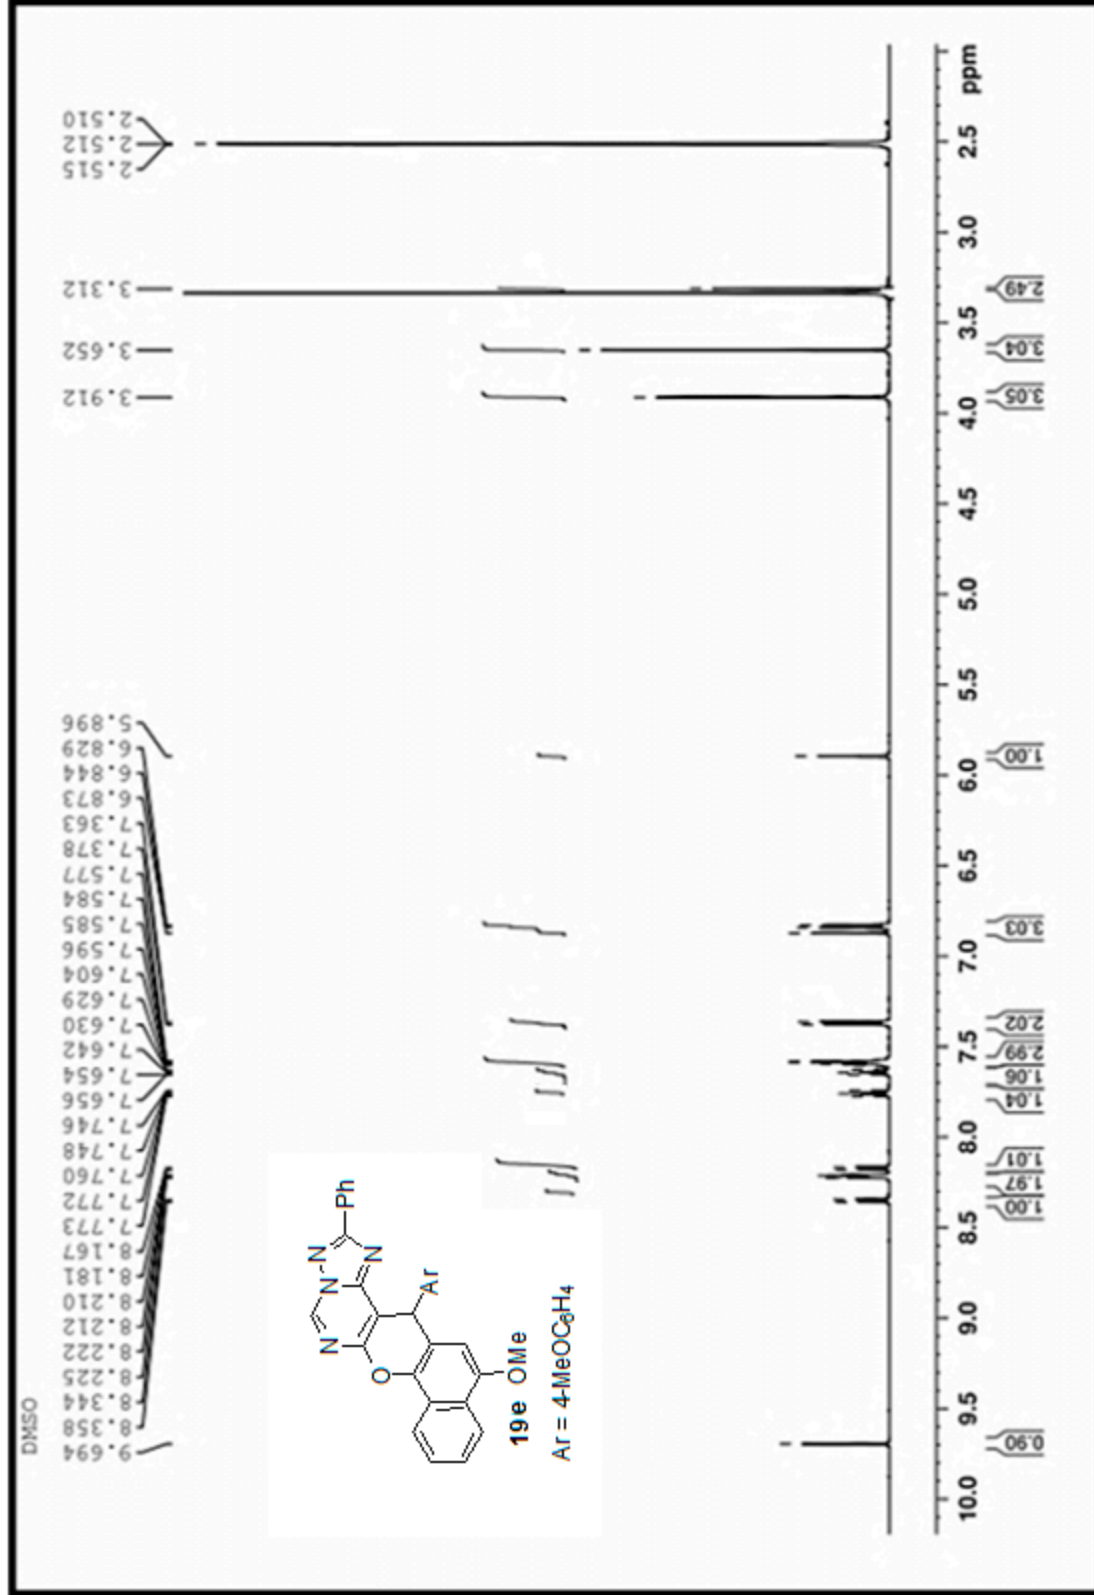

Supplement: s1 [file s1]
